# Supplementary material for: Mechanistic study of the solvent-controlled Pd(ii)-catalyzed chemoselective intermolecular 1,2-aminooxygenation and 1,2-oxyamination of conjugated dienes
Source: Royal Society of Chemistry journal article supplement (doi:10.1039/c8qo01288a), 2019-01-01
Supplement: c8qo01288a1.pdf [file c8qo01288a1.pdf]

## Supporting Information

# **Mechanistic study of the solvent-controlled Pd(II)- catalyzed chemoselective intermolecular 1,2- aminooxygenation and 1,2-oxyamination of conjugated dienes**

Yunyi Li,<sup>§</sup> Zhengxing Wu,<sup>§</sup> Zheng Ling, Hongjin Chen\* and Wanbin Zhang\*

Shanghai Key Laboratory for Molecular Engineering of Chiral Drugs, School of Chemistry and Chemical Engineering, Shanghai Jiao Tong University, 800 Dongchuan Road, Shanghai 200240, P. R. China

## 1. Experimental studies

### 1.1 The transformation between 3a and 4a

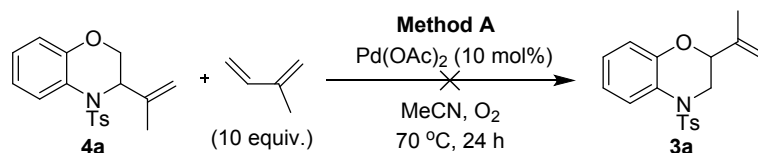

To a sealed tube (15 mL) were added **4a** (32.9 mg, 0.10 mmol, 1 equiv.), Pd(OAc)<sub>2</sub> (2.2 mg, 0.1 equiv.), followed by the solvent MeCN (1 mL). Afterwards, the system was degassed and recharged with O<sub>2</sub> balloon three times. Finally, the isoprene (1.0 mmol, 10 equiv.) was added and the tube was sealed and heated to 70 °C. After stirring for 24 h, the reaction mixture was cooled to room temperature, and the solvent was removed by rotary evaporation. The residue was purified by preparative TLC on silica gel (normal ratio: petroleum ether/EtOAc = 5/1) to give the substrate **4a**, and no product **3a** was detected.

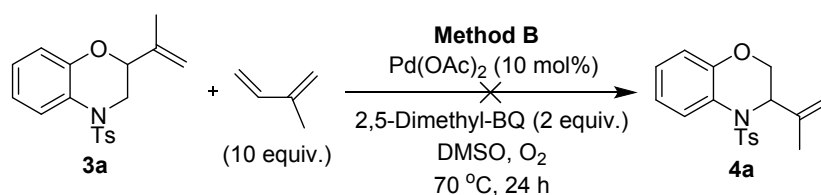

To a sealed tube (15 mL) were added substrate **3a** (32.9 mg, 0.10 mmol, 1 equiv.), Pd(OAc)<sub>2</sub> (2.2 mg, 0.1 equiv.), 2,5-dimethyl-BQ (27.2 mg, 0.20 mmol, 2 equiv.), followed by the solvent DMSO (1 mL). Afterwards the system was degassed and recharged with O<sub>2</sub> balloon three times. Finally, the isoprene (1.0 mmol, 10 equiv.) was added and the tube was sealed and heated to 70 °C. After stirring for 24 h, the reaction mixture was cooled to room temperature, the mixture was purified by preparative TLC on silica gel (normal ratio: petroleum ether/EtOAc = 5/1) to give the substrate **3a**, and no product **4a** was detected.

### 1.2 The selectivity in the absence of quinone

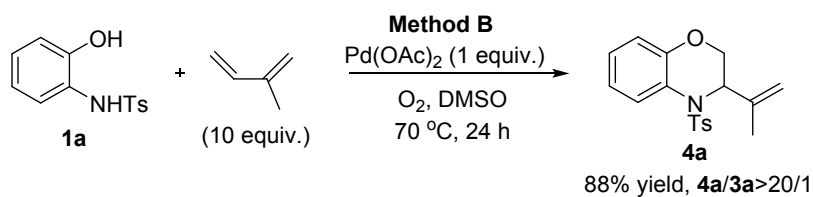

To a sealed tube (15 mL) were added **1a** (52.7 mg, 0.20 mmol, 1 equiv.),  $\text{Pd(OAc)}_2$  (45.0 mg, 1 equiv.), followed by the solvent DMSO (2 mL). Afterwards the system was degassed and recharged with  $\text{O}_2$  (balloon) three times. Finally, the isoprene (2.0 mmol, 10 equiv.) was added and the tube was sealed and heated to  $70\text{ }^\circ\text{C}$ . After stirring for 24 h, the reaction mixture was cooled to room temperature, the mixture was purified by preparative TLC on silica gel (normal ratio: petroleum ether/EtOAc = 5/1) to give products **4a** and **3a** in 88% total yield (**4a/3a**>20/1).

## 2. DFT Calculation

| Species       | Zero-point Energy, a.u. | Free Energy (298 K), a.u. |
|---------------|-------------------------|---------------------------|
| 2b in MeCN    | -155.854724             | -155.880697               |
| 2b in DMSO    | -155.852173             | -155.878116               |
| Molecule MeCN | -132.672753             | -132.695694               |
| Molecule DMSO | -553.057410             | -553.085680               |
| 5             | -1573.410357            | -1573.470977              |
| Ts1-a         | -1596.558636            | -1596.616150              |
| Ts1-b         | -1596.555862            | -1596.613359              |
| Ts1-c         | -1463.862145            | -1463.913815              |
| Ts1-d         | -1463.854251            | -1463.905528              |
| 6             | -1596.587907            | -1596.646871              |
| Ts2           | -1596.573505            | -1596.631331              |
| 7             | -1596.594704            | -1596.652483              |
| Ts3           | -1596.567801            | -1596.627064              |
| 8             | -1596.606763            | -1596.665069              |
| 9a            | -2414.195726            | -2414.256705              |
| 9b            | -2414.185190            | -2414.244936              |
| 9c            | -2414.194452            | -2414.256530              |
| 9d            | -2414.191797            | -2414.251469              |
| 9e            | -1861.086890            | -1861.141050              |
| 9f            | -1861.086908            | -1861.140782              |
| Ts4-a         | -2016.946852            | -2017.004274              |
| Ts4-b         | -2016.940911            | -2016.999765              |
| Ts4-c         | -2016.941314            | -2017.000935              |
| Ts4-d         | -2016.942286            | -2017.001147              |
| Ts4-e         | -1463.848749            | -1463.899688              |

|       |              |              |
|-------|--------------|--------------|
| Ts4-f | -1463.857146 | -1463.908376 |
| 10    | -2016.967280 | -2017.026028 |
| Ts5   | -2016.956126 | -2017.014741 |
| 11    | -2016.979215 | -2017.036087 |
| Ts6   | -2016.954090 | -2017.012222 |
| 12    | -2016.995547 | -2017.054466 |

The details include Cartesian coordinates, computed geometries of compounds, transition states, and computed total energies.

1,3-Butadiene **2b** in MeCN:

Sum of electronic and zero-point Energies= -155.854724

Sum of electronic and thermal Energies= -155.850088

Sum of electronic and thermal Enthalpies= -155.849144

Sum of electronic and thermal Free Energies= -155.880697

Standard orientation:

| Center<br>Number | Atomic<br>Number | Atomic<br>Type | Coordinates (Angstroms) |           |           |
|------------------|------------------|----------------|-------------------------|-----------|-----------|
|                  |                  |                | X                       | Y         | Z         |
| 1                | 6                | 0              | 0.099085                | 0.729496  | -0.556088 |
| 2                | 6                | 0              | -0.099085               | 1.530120  | 0.494149  |
| 3                | 1                | 0              | 0.412111                | 1.167913  | -1.502683 |
| 4                | 1                | 0              | -0.460834               | 1.145569  | 1.445112  |
| 5                | 1                | 0              | 0.083075                | 2.598745  | 0.429209  |
| 6                | 6                | 0              | -0.099085               | -0.729496 | -0.556088 |
| 7                | 6                | 0              | 0.099085                | -1.530120 | 0.494149  |
| 8                | 1                | 0              | -0.412111               | -1.167913 | -1.502683 |
| 9                | 1                | 0              | 0.460834                | -1.145569 | 1.445112  |
| 10               | 1                | 0              | -0.083075               | -2.598745 | 0.429209  |

1,3-Butadiene **2b** in DMSO:

Sum of electronic and zero-point Energies= -155.852173

Sum of electronic and thermal Energies= -155.847557

Sum of electronic and thermal Enthalpies= -155.846612

Sum of electronic and thermal Free Energies= -155.878116

Standard orientation:

| Center<br>Number | Atomic<br>Number | Atomic<br>Type | Coordinates (Angstroms) |           |           |
|------------------|------------------|----------------|-------------------------|-----------|-----------|
|                  |                  |                | X                       | Y         | Z         |
| 1                | 6                | 0              | 0.100670                | 0.729147  | -0.555717 |
| 2                | 6                | 0              | -0.100670               | 1.529698  | 0.493716  |
| 3                | 1                | 0              | 0.417950                | 1.166929  | -1.501160 |
| 4                | 1                | 0              | -0.467654               | 1.145870  | 1.442989  |
| 5                | 1                | 0              | 0.084165                | 2.597981  | 0.430179  |
| 6                | 6                | 0              | -0.100670               | -0.729147 | -0.555717 |
| 7                | 6                | 0              | 0.100670                | -1.529698 | 0.493716  |
| 8                | 1                | 0              | -0.417950               | -1.166929 | -1.501160 |
| 9                | 1                | 0              | 0.467654                | -1.145870 | 1.442989  |
| 10               | 1                | 0              | -0.084165               | -2.597981 | 0.430179  |

Molecule MeCN:

Sum of electronic and zero-point Energies= -132.672753

Sum of electronic and thermal Energies= -132.669195

Sum of electronic and thermal Enthalpies= -132.668250

Sum of electronic and thermal Free Energies= -132.695694

Standard orientation:

| Center<br>Number | Atomic<br>Number | Atomic<br>Type | Coordinates (Angstroms) |           |           |
|------------------|------------------|----------------|-------------------------|-----------|-----------|
|                  |                  |                | X                       | Y         | Z         |
| 1                | 6                | 0              | 0.000000                | 0.000000  | 0.277042  |
| 2                | 7                | 0              | 0.000000                | 0.000000  | 1.435078  |
| 3                | 6                | 0              | 0.000000                | 0.000000  | -1.178075 |
| 4                | 1                | 0              | 0.000000                | 1.028149  | -1.546451 |
| 5                | 1                | 0              | 0.890403                | -0.514074 | -1.546451 |
| 6                | 1                | 0              | -0.890403               | -0.514074 | -1.546451 |

Molecule DMSO:

Sum of electronic and zero-point Energies= -553.057410

Sum of electronic and thermal Energies= -553.051849

Sum of electronic and thermal Enthalpies= -553.050905

Sum of electronic and thermal Free Energies= -553.085680

Standard orientation:

| Center Number | Atomic Number | Atomic Type | Coordinates (Angstroms) |           |           |
|---------------|---------------|-------------|-------------------------|-----------|-----------|
|               |               |             | X                       | Y         | Z         |
| 1             | 16            | 0           | 0.000059                | 0.229282  | -0.433025 |
| 2             | 8             | 0           | 0.000526                | 1.507578  | 0.374377  |
| 3             | 6             | 0           | 1.347187                | -0.807999 | 0.180576  |
| 4             | 1             | 0           | 1.309299                | -1.779310 | -0.319309 |
| 5             | 1             | 0           | 2.288786                | -0.310536 | -0.060749 |
| 6             | 1             | 0           | 1.256929                | -0.930647 | 1.263222  |
| 7             | 6             | 0           | -1.347717               | -0.807187 | 0.180593  |
| 8             | 1             | 0           | -2.288999               | -0.308801 | -0.060085 |
| 9             | 1             | 0           | -1.310856               | -1.778246 | -0.319850 |
| 10            | 1             | 0           | -1.257130               | -0.930470 | 1.263146  |

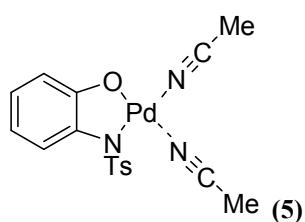

Sum of electronic and zero-point Energies= -1573.410357

Sum of electronic and thermal Energies= -1573.384290

Sum of electronic and thermal Enthalpies= -1573.383345

Sum of electronic and thermal Free Energies= -1573.470977

Standard orientation:

| Center Number | Atomic Number | Atomic Type | Coordinates (Angstroms) |           |           |
|---------------|---------------|-------------|-------------------------|-----------|-----------|
|               |               |             | X                       | Y         | Z         |
| 1             | 6             | 0           | -2.982271               | -2.913345 | 1.593300  |
| 2             | 6             | 0           | -2.045230               | -2.747627 | 0.572908  |
| 3             | 6             | 0           | -1.081836               | -1.746165 | 0.670441  |
| 4             | 6             | 0           | -1.008197               | -0.939509 | 1.820168  |
| 5             | 6             | 0           | -1.956079               | -1.105778 | 2.837382  |
| 6             | 6             | 0           | -2.939034               | -2.084991 | 2.714705  |
| 7             | 1             | 0           | -3.736919               | -3.689293 | 1.512807  |
| 8             | 1             | 0           | -2.069222               | -3.375965 | -0.309905 |
| 9             | 1             | 0           | -1.904986               | -0.467187 | 3.714596  |
| 10            | 1             | 0           | -3.669019               | -2.209299 | 3.509761  |
| 11            | 8             | 0           | -0.028985               | -0.034660 | 1.921140  |

|    |    |   |           |           |           |
|----|----|---|-----------|-----------|-----------|
| 12 | 7  | 0 | -0.096928 | -1.469307 | -0.345594 |
| 13 | 16 | 0 | -0.738555 | -0.923934 | -1.778880 |
| 14 | 8  | 0 | 0.367635  | -0.694178 | -2.704806 |
| 15 | 46 | 0 | 1.300598  | -0.259815 | 0.481400  |
| 16 | 8  | 0 | -1.810488 | -1.824725 | -2.204712 |
| 17 | 6  | 0 | -1.489386 | 0.653425  | -1.417912 |
| 18 | 6  | 0 | -2.753085 | 0.695571  | -0.828652 |
| 19 | 6  | 0 | -0.766030 | 1.821861  | -1.638002 |
| 20 | 6  | 0 | -3.284753 | 1.923614  | -0.454838 |
| 21 | 1  | 0 | -3.313454 | -0.219052 | -0.666692 |
| 22 | 6  | 0 | -1.317784 | 3.044521  | -1.268488 |
| 23 | 1  | 0 | 0.215398  | 1.772999  | -2.098366 |
| 24 | 6  | 0 | -2.577858 | 3.114008  | -0.666125 |
| 25 | 1  | 0 | -4.267533 | 1.960739  | 0.007047  |
| 26 | 1  | 0 | -0.760335 | 3.958959  | -1.451150 |
| 27 | 6  | 0 | -3.174001 | 4.433296  | -0.253972 |
| 28 | 1  | 0 | -3.359635 | 4.456748  | 0.824924  |
| 29 | 1  | 0 | -2.511813 | 5.266079  | -0.503525 |
| 30 | 1  | 0 | -4.135432 | 4.599362  | -0.750852 |
| 31 | 6  | 0 | 3.329756  | 1.622864  | 2.098734  |
| 32 | 7  | 0 | 2.615046  | 0.950016  | 1.496740  |
| 33 | 6  | 0 | 4.225491  | 2.468261  | 2.862803  |
| 34 | 1  | 0 | 3.766202  | 3.450162  | 2.996609  |
| 35 | 1  | 0 | 4.404288  | 2.009770  | 3.837995  |
| 36 | 1  | 0 | 5.170693  | 2.572856  | 2.325882  |
| 37 | 6  | 0 | 3.505708  | -0.797061 | -1.741902 |
| 38 | 7  | 0 | 2.702655  | -0.579234 | -0.947422 |
| 39 | 6  | 0 | 4.503963  | -1.075640 | -2.755051 |
| 40 | 1  | 0 | 5.481217  | -0.735891 | -2.405537 |
| 41 | 1  | 0 | 4.534047  | -2.151395 | -2.942296 |
| 42 | 1  | 0 | 4.238891  | -0.550821 | -3.675652 |

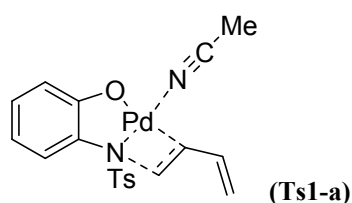

Imaginary Freq.: -299.96 cm<sup>-1</sup>

Sum of electronic and zero-point Energies= -1596.558636

Sum of electronic and thermal Energies= -1596.532621

Sum of electronic and thermal Enthalpies= -1596.531677



Sum of electronic and thermal Free Energies= -1596.616150

Standard orientation:

| Center<br>Number | Atomic<br>Number | Atomic<br>Type | Coordinates (Angstroms) |           |           |
|------------------|------------------|----------------|-------------------------|-----------|-----------|
|                  |                  |                | X                       | Y         | Z         |
| 1                | 6                | 0              | -2.550227               | -3.036471 | 1.925616  |
| 2                | 6                | 0              | -1.598606               | -2.871471 | 0.923219  |
| 3                | 6                | 0              | -0.868885               | -1.688563 | 0.841093  |
| 4                | 6                | 0              | -1.027190               | -0.644415 | 1.797876  |
| 5                | 6                | 0              | -2.037945               | -0.813582 | 2.767494  |
| 6                | 6                | 0              | -2.769481               | -1.993406 | 2.830879  |
| 7                | 1                | 0              | -3.117186               | -3.958811 | 1.996240  |
| 8                | 1                | 0              | -1.429713               | -3.642637 | 0.178520  |
| 9                | 1                | 0              | -2.205345               | -0.016251 | 3.485964  |
| 10               | 1                | 0              | -3.519069               | -2.107112 | 3.609792  |
| 11               | 8                | 0              | -0.252634               | 0.417247  | 1.778091  |
| 12               | 7                | 0              | 0.008423                | -1.406857 | -0.265716 |
| 13               | 16               | 0              | -0.803270               | -0.977191 | -1.676167 |
| 14               | 8                | 0              | 0.209076                | -0.727067 | -2.698106 |
| 15               | 8                | 0              | -1.822949               | -1.987798 | -1.942645 |
| 16               | 6                | 0              | -1.638584               | 0.550309  | -1.322721 |
| 17               | 6                | 0              | -0.991185               | 1.756292  | -1.583910 |
| 18               | 6                | 0              | -2.896977               | 0.519462  | -0.730717 |
| 19               | 6                | 0              | -1.622259               | 2.945632  | -1.247465 |
| 20               | 1                | 0              | -0.008833               | 1.760480  | -2.045049 |
| 21               | 6                | 0              | -3.511105               | 1.721334  | -0.391975 |
| 22               | 1                | 0              | -3.388170               | -0.427399 | -0.533490 |
| 23               | 6                | 0              | -2.887338               | 2.946657  | -0.644111 |
| 24               | 1                | 0              | -1.127134               | 3.890425  | -1.453857 |
| 25               | 1                | 0              | -4.490490               | 1.704435  | 0.077074  |
| 26               | 6                | 0              | -3.569649               | 4.247134  | -0.316297 |
| 27               | 1                | 0              | -3.976960               | 4.702741  | -1.226200 |
| 28               | 1                | 0              | -4.397013               | 4.099912  | 0.382237  |
| 29               | 1                | 0              | -2.868084               | 4.964525  | 0.119110  |
| 30               | 46               | 0              | 1.324892                | -0.067515 | 0.478954  |
| 31               | 6                | 0              | 3.503245                | -0.450492 | -1.608768 |
| 32               | 6                | 0              | 3.321377                | -0.583046 | -2.924638 |
| 33               | 1                | 0              | 4.235453                | 0.272620  | -1.252477 |
| 34               | 1                | 0              | 3.890046                | 0.026182  | -3.621178 |
| 35               | 1                | 0              | 2.608247                | -1.283228 | -3.347356 |
| 36               | 6                | 0              | 2.833022                | -1.199220 | -0.519966 |
| 37               | 6                | 0              | 1.882421                | -2.228360 | -0.722732 |
| 38               | 1                | 0              | 3.448360                | -1.334198 | 0.371997  |

|    |   |   |          |           |           |
|----|---|---|----------|-----------|-----------|
| 39 | 1 | 0 | 1.760196 | -2.989851 | 0.039889  |
| 40 | 1 | 0 | 1.559765 | -2.500129 | -1.720875 |
| 41 | 7 | 0 | 2.650453 | 1.265787  | 1.269012  |
| 42 | 6 | 0 | 3.386012 | 2.032131  | 1.715210  |
| 43 | 6 | 0 | 4.313752 | 2.996271  | 2.273219  |
| 44 | 1 | 0 | 4.084728 | 3.147566  | 3.330335  |
| 45 | 1 | 0 | 5.333125 | 2.618785  | 2.166965  |
| 46 | 1 | 0 | 4.212890 | 3.943919  | 1.739504  |

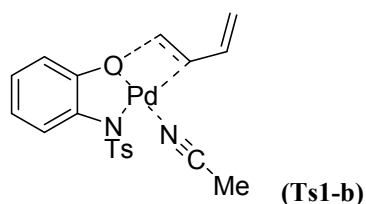

Imaginary Freq.: -319.87 cm<sup>-1</sup>

Sum of electronic and zero-point Energies= -1596.555862

Sum of electronic and thermal Energies= -1596.529974

Sum of electronic and thermal Enthalpies= -1596.529030

Sum of electronic and thermal Free Energies= -1596.613359

Standard orientation:

| Center Number | Atomic Number | Atomic Type | Coordinates (Angstroms) |           |           |
|---------------|---------------|-------------|-------------------------|-----------|-----------|
|               |               |             | X                       | Y         | Z         |
| 1             | 6             | 0           | -4.177567               | -1.873905 | 0.464412  |
| 2             | 6             | 0           | -3.089885               | -1.827218 | -0.407361 |
| 3             | 6             | 0           | -1.869848               | -1.287828 | 0.005946  |
| 4             | 6             | 0           | -1.778027               | -0.764672 | 1.315315  |
| 5             | 6             | 0           | -2.856388               | -0.832671 | 2.193150  |
| 6             | 6             | 0           | -4.060193               | -1.388185 | 1.764855  |
| 7             | 1             | 0           | -5.110762               | -2.315840 | 0.129258  |
| 8             | 1             | 0           | -3.171571               | -2.226727 | -1.411464 |
| 9             | 1             | 0           | -2.742584               | -0.432479 | 3.196366  |
| 10            | 1             | 0           | -4.901295               | -1.440961 | 2.449257  |
| 11            | 8             | 0           | -0.644622               | -0.095857 | 1.669462  |
| 12            | 7             | 0           | -0.683090               | -1.314929 | -0.791050 |
| 13            | 16            | 0           | -0.705489               | -0.437554 | -2.179926 |
| 14            | 8             | 0           | 0.502219                | -0.787642 | -2.928139 |
| 15            | 8             | 0           | -1.996501               | -0.554959 | -2.865394 |
| 16            | 6             | 0           | -0.544071               | 1.261578  | -1.650675 |
| 17            | 6             | 0           | 0.726710                | 1.819086  | -1.510850 |

|    |    |   |           |           |           |
|----|----|---|-----------|-----------|-----------|
| 18 | 6  | 0 | -1.674675 | 1.957622  | -1.235540 |
| 19 | 6  | 0 | 0.860561  | 3.077193  | -0.939780 |
| 20 | 1  | 0 | 1.601288  | 1.267003  | -1.839798 |
| 21 | 6  | 0 | -1.524487 | 3.219376  | -0.663202 |
| 22 | 1  | 0 | -2.660822 | 1.520963  | -1.354842 |
| 23 | 6  | 0 | -0.260660 | 3.791097  | -0.495636 |
| 24 | 1  | 0 | 1.850096  | 3.512543  | -0.829802 |
| 25 | 1  | 0 | -2.406785 | 3.763886  | -0.338701 |
| 26 | 6  | 0 | -0.089239 | 5.136787  | 0.157160  |
| 27 | 1  | 0 | 0.527059  | 5.797383  | -0.460540 |
| 28 | 1  | 0 | -1.052156 | 5.624115  | 0.328662  |
| 29 | 1  | 0 | 0.414812  | 5.033867  | 1.124617  |
| 30 | 46 | 0 | 0.860128  | -0.835075 | 0.581311  |
| 31 | 6  | 0 | 1.884029  | -0.428659 | 2.408322  |
| 32 | 6  | 0 | 0.646395  | -0.491538 | 3.102104  |
| 33 | 1  | 0 | 2.481689  | -1.338723 | 2.468962  |
| 34 | 1  | 0 | 0.263333  | -1.459286 | 3.412178  |
| 35 | 1  | 0 | 0.268576  | 0.363731  | 3.650827  |
| 36 | 6  | 0 | 2.636976  | 0.842887  | 2.293283  |
| 37 | 6  | 0 | 2.123522  | 2.074570  | 2.379101  |
| 38 | 1  | 0 | 3.701207  | 0.726172  | 2.095565  |
| 39 | 1  | 0 | 2.754376  | 2.952566  | 2.280825  |
| 40 | 1  | 0 | 1.062806  | 2.249403  | 2.544819  |
| 41 | 6  | 0 | 3.372722  | -1.877472 | -1.030847 |
| 42 | 7  | 0 | 2.455057  | -1.512948 | -0.438493 |
| 43 | 6  | 0 | 4.525687  | -2.332234 | -1.782696 |
| 44 | 1  | 0 | 4.874239  | -3.282738 | -1.372647 |
| 45 | 1  | 0 | 4.244549  | -2.464619 | -2.829831 |
| 46 | 1  | 0 | 5.321948  | -1.588033 | -1.708200 |

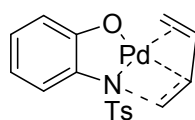

**(Ts1-c)**

Imaginary Freq.: -323.60 cm<sup>-1</sup>

Sum of electronic and zero-point Energies= -1463.862145

Sum of electronic and thermal Energies= -1463.841287

Sum of electronic and thermal Enthalpies= -1463.840343

Sum of electronic and thermal Free Energies= -1463.913815

Standard orientation:

---

| Center | Atomic | Atomic | Coordinates (Angstroms) |
|--------|--------|--------|-------------------------|
|--------|--------|--------|-------------------------|

| Number | Number | Type | X         | Y         | Z         |
|--------|--------|------|-----------|-----------|-----------|
| 1      | 6      | 0    | -0.489824 | 4.026700  | 0.155785  |
| 2      | 6      | 0    | 0.093544  | 2.949649  | 0.812041  |
| 3      | 6      | 0    | 0.306692  | 1.742419  | 0.141939  |
| 4      | 6      | 0    | 0.010277  | 1.612338  | -1.246220 |
| 5      | 6      | 0    | -0.614627 | 2.709330  | -1.876717 |
| 6      | 6      | 0    | -0.854129 | 3.889276  | -1.187837 |
| 7      | 1      | 0    | -0.659568 | 4.960423  | 0.681697  |
| 8      | 1      | 0    | 0.365750  | 3.020972  | 1.859332  |
| 9      | 1      | 0    | -0.874842 | 2.613829  | -2.927067 |
| 10     | 1      | 0    | -1.316802 | 4.723434  | -1.708548 |
| 11     | 8      | 0    | 0.321213  | 0.531137  | -1.934713 |
| 12     | 7      | 0    | 0.780743  | 0.574816  | 0.828981  |
| 13     | 16     | 0    | -0.252105 | -0.096118 | 1.963693  |
| 14     | 8      | 0    | 0.440163  | -1.249060 | 2.533202  |
| 15     | 8      | 0    | -0.730555 | 0.940059  | 2.873776  |
| 16     | 6      | 0    | -1.636668 | -0.661891 | 1.004050  |
| 17     | 6      | 0    | -1.625189 | -1.960280 | 0.495519  |
| 18     | 6      | 0    | -2.662933 | 0.224912  | 0.696818  |
| 19     | 6      | 0    | -2.664985 | -2.369552 | -0.326888 |
| 20     | 1      | 0    | -0.815446 | -2.639107 | 0.743997  |
| 21     | 6      | 0    | -3.694249 | -0.201279 | -0.135906 |
| 22     | 1      | 0    | -2.659081 | 1.232278  | 1.099274  |
| 23     | 6      | 0    | -3.710555 | -1.496515 | -0.659521 |
| 24     | 1      | 0    | -2.667299 | -3.381877 | -0.721293 |
| 25     | 1      | 0    | -4.496788 | 0.487731  | -0.382101 |
| 26     | 6      | 0    | -4.828556 | -1.962955 | -1.552364 |
| 27     | 1      | 0    | -5.500798 | -1.142756 | -1.815162 |
| 28     | 1      | 0    | -4.433877 | -2.396406 | -2.476566 |
| 29     | 1      | 0    | -5.418877 | -2.740846 | -1.056071 |
| 30     | 46     | 0    | 1.464187  | -0.661224 | -0.706794 |
| 31     | 6      | 0    | 2.890252  | -1.333379 | 0.685419  |
| 32     | 6      | 0    | 2.753481  | 0.020198  | 1.167701  |
| 33     | 1      | 0    | 2.638902  | -2.114779 | 1.394723  |
| 34     | 1      | 0    | 2.627889  | 0.148379  | 2.234403  |
| 35     | 1      | 0    | 3.222887  | 0.852265  | 0.650626  |
| 36     | 6      | 0    | 3.340453  | -1.779292 | -0.608340 |
| 37     | 6      | 0    | 3.437379  | -0.957418 | -1.727785 |
| 38     | 1      | 0    | 3.378832  | -2.857517 | -0.738700 |
| 39     | 1      | 0    | 3.572708  | -1.421017 | -2.699772 |
| 40     | 1      | 0    | 3.703526  | 0.094820  | -1.652502 |

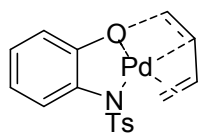

(Ts1-d)

Imaginary Freq.: -344.76 cm<sup>-1</sup>

Sum of electronic and zero-point Energies= -1463.854251

Sum of electronic and thermal Energies= -1463.833345

Sum of electronic and thermal Enthalpies= -1463.832401

Sum of electronic and thermal Free Energies= -1463.905528

Standard orientation:

| Center Number | Atomic Number | Atomic Type | Coordinates (Angstroms) |           |           |
|---------------|---------------|-------------|-------------------------|-----------|-----------|
|               |               |             | X                       | Y         | Z         |
| 1             | 6             | 0           | 0.514813                | 4.124136  | -0.300757 |
| 2             | 6             | 0           | 0.450809                | 3.080466  | 0.618707  |
| 3             | 6             | 0           | 0.596957                | 1.749785  | 0.211315  |
| 4             | 6             | 0           | 0.803632                | 1.489812  | -1.166247 |
| 5             | 6             | 0           | 0.895668                | 2.544521  | -2.076599 |
| 6             | 6             | 0           | 0.743439                | 3.859426  | -1.649531 |
| 7             | 1             | 0           | 0.408571                | 5.147495  | 0.045922  |
| 8             | 1             | 0           | 0.295019                | 3.284171  | 1.671451  |
| 9             | 1             | 0           | 1.068860                | 2.310097  | -3.122664 |
| 10            | 1             | 0           | 0.809118                | 4.671131  | -2.367382 |
| 11            | 8             | 0           | 0.844405                | 0.214741  | -1.647239 |
| 12            | 7             | 0           | 0.620610                | 0.664268  | 1.143935  |
| 13            | 16            | 0           | -0.731170               | 0.403787  | 2.030966  |
| 14            | 8             | 0           | -0.429860               | -0.688050 | 2.958944  |
| 15            | 8             | 0           | -1.254222               | 1.652115  | 2.594037  |
| 16            | 6             | 0           | -1.950681               | -0.190633 | 0.867684  |
| 17            | 6             | 0           | -2.069451               | -1.559739 | 0.632258  |
| 18            | 6             | 0           | -2.683556               | 0.726060  | 0.119036  |
| 19            | 6             | 0           | -2.934774               | -2.007681 | -0.358094 |
| 20            | 1             | 0           | -1.491055               | -2.263455 | 1.222878  |
| 21            | 6             | 0           | -3.542043               | 0.261990  | -0.874022 |
| 22            | 1             | 0           | -2.586273               | 1.789738  | 0.309546  |
| 23            | 6             | 0           | -3.680114               | -1.105691 | -1.128339 |
| 24            | 1             | 0           | -3.036565               | -3.074627 | -0.537368 |
| 25            | 1             | 0           | -4.114809               | 0.975586  | -1.459720 |
| 26            | 6             | 0           | -4.626777               | -1.607099 | -2.185967 |
| 27            | 1             | 0           | -4.895836               | -0.815003 | -2.889457 |
| 28            | 1             | 0           | -4.185398               | -2.435239 | -2.748066 |

|    |    |   |           |           |           |
|----|----|---|-----------|-----------|-----------|
| 29 | 1  | 0 | -5.551663 | -1.978343 | -1.730452 |
| 30 | 46 | 0 | 1.289333  | -0.978754 | 0.038084  |
| 31 | 6  | 0 | 2.817411  | -2.511976 | -0.084104 |
| 32 | 6  | 0 | 3.139195  | -1.655792 | 0.979035  |
| 33 | 1  | 0 | 2.612927  | -3.560066 | 0.117547  |
| 34 | 1  | 0 | 3.195184  | -2.080320 | 1.976482  |
| 35 | 1  | 0 | 3.685469  | -0.727238 | 0.823916  |
| 36 | 6  | 0 | 2.422394  | -2.044396 | -1.382617 |
| 37 | 6  | 0 | 2.584507  | -0.715441 | -1.936265 |
| 38 | 1  | 0 | 1.970611  | -2.782749 | -2.038750 |
| 39 | 1  | 0 | 2.417172  | -0.602881 | -2.999108 |
| 40 | 1  | 0 | 3.272633  | -0.003041 | -1.488540 |

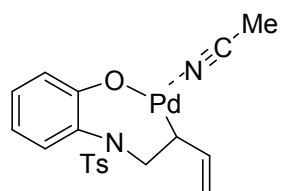

(6)

Sum of electronic and zero-point Energies= -1596.587907

Sum of electronic and thermal Energies= -1596.561718

Sum of electronic and thermal Enthalpies= -1596.560774

Sum of electronic and thermal Free Energies= -1596.646871

Standard orientation:

| Center Number | Atomic Number | Atomic Type | Coordinates (Angstroms) |           |           |
|---------------|---------------|-------------|-------------------------|-----------|-----------|
|               |               |             | X                       | Y         | Z         |
| 1             | 6             | 0           | 1.914358                | 2.835290  | 1.441816  |
| 2             | 6             | 0           | 1.525303                | 1.520271  | 1.216775  |
| 3             | 6             | 0           | 0.404086                | 1.246151  | 0.438214  |
| 4             | 6             | 0           | -0.419319               | 2.272395  | -0.122014 |
| 5             | 6             | 0           | 0.042377                | 3.597478  | 0.089745  |
| 6             | 6             | 0           | 1.169940                | 3.863466  | 0.851667  |
| 7             | 1             | 0           | 2.783362                | 3.055277  | 2.052368  |
| 8             | 1             | 0           | 2.089651                | 0.694465  | 1.642277  |
| 9             | 1             | 0           | -0.538343               | 4.409386  | -0.339166 |
| 10            | 1             | 0           | 1.469126                | 4.897312  | 1.004929  |
| 11            | 8             | 0           | -1.530567               | 2.025846  | -0.755898 |
| 12            | 7             | 0           | 0.026863                | -0.127054 | 0.126343  |
| 13            | 16            | 0           | 0.897670                | -0.780289 | -1.258260 |
| 14            | 8             | 0           | 0.425428                | -2.147752 | -1.415794 |

|    |    |   |           |           |           |
|----|----|---|-----------|-----------|-----------|
| 15 | 8  | 0 | 0.741616  | 0.184400  | -2.332069 |
| 16 | 6  | 0 | 2.588266  | -0.802683 | -0.745577 |
| 17 | 6  | 0 | 3.079196  | -1.902402 | -0.042254 |
| 18 | 6  | 0 | 3.395507  | 0.298071  | -1.030357 |
| 19 | 6  | 0 | 4.397414  | -1.881450 | 0.395406  |
| 20 | 1  | 0 | 2.452685  | -2.767794 | 0.144820  |
| 21 | 6  | 0 | 4.711529  | 0.294977  | -0.589763 |
| 22 | 1  | 0 | 3.000787  | 1.141006  | -1.585905 |
| 23 | 6  | 0 | 5.227657  | -0.784657 | 0.136534  |
| 24 | 1  | 0 | 4.790769  | -2.735164 | 0.938959  |
| 25 | 1  | 0 | 5.348273  | 1.146224  | -0.811446 |
| 26 | 6  | 0 | 6.641906  | -0.756379 | 0.646245  |
| 27 | 1  | 0 | 6.673554  | -0.308953 | 1.646239  |
| 28 | 1  | 0 | 7.059472  | -1.763620 | 0.722740  |
| 29 | 1  | 0 | 7.285466  | -0.156364 | -0.002252 |
| 30 | 46 | 0 | -1.995612 | -0.042111 | -0.226232 |
| 31 | 6  | 0 | -2.580986 | -1.844705 | 1.990521  |
| 32 | 6  | 0 | -2.505958 | -1.362571 | 3.236952  |
| 33 | 1  | 0 | -3.472938 | -2.404603 | 1.710202  |
| 34 | 1  | 0 | -3.311566 | -1.533877 | 3.944864  |
| 35 | 1  | 0 | -1.654944 | -0.792088 | 3.600163  |
| 36 | 6  | 0 | -1.594353 | -1.695132 | 0.898632  |
| 37 | 6  | 0 | -0.203514 | -1.152905 | 1.226649  |
| 38 | 1  | 0 | -1.556778 | -2.570842 | 0.248755  |
| 39 | 1  | 0 | 0.591967  | -1.901490 | 1.247081  |
| 40 | 1  | 0 | -0.169511 | -0.593288 | 2.160954  |
| 41 | 6  | 0 | -5.155792 | -0.235183 | -0.553403 |
| 42 | 7  | 0 | -4.011258 | -0.186320 | -0.424385 |
| 43 | 6  | 0 | -6.595051 | -0.301066 | -0.717724 |
| 44 | 1  | 0 | -6.829057 | -0.879012 | -1.614727 |
| 45 | 1  | 0 | -7.037523 | -0.784980 | 0.155698  |
| 46 | 1  | 0 | -6.995478 | 0.709991  | -0.819743 |

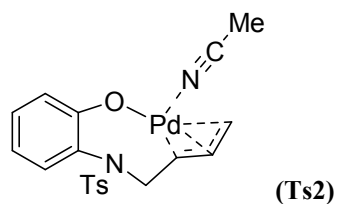

Imaginary Freq.: -132.74 cm<sup>-1</sup>

Sum of electronic and zero-point Energies= -1596.573505

Sum of electronic and thermal Energies= -1596.547920

Sum of electronic and thermal Enthalpies= -1596.546976

Sum of electronic and thermal Free Energies= -1596.631331

Standard orientation:

| Center<br>Number | Atomic<br>Number | Atomic<br>Type | Coordinates (Angstroms) |           |           |
|------------------|------------------|----------------|-------------------------|-----------|-----------|
|                  |                  |                | X                       | Y         | Z         |
| 1                | 6                | 0              | 2.108638                | 3.192593  | 0.131703  |
| 2                | 6                | 0              | 1.689731                | 1.912650  | 0.472819  |
| 3                | 6                | 0              | 0.471052                | 1.413043  | 0.014813  |
| 4                | 6                | 0              | -0.425860               | 2.203054  | -0.777562 |
| 5                | 6                | 0              | 0.064385                | 3.485226  | -1.144325 |
| 6                | 6                | 0              | 1.286454                | 3.962729  | -0.698435 |
| 7                | 1                | 0              | 3.053906                | 3.579223  | 0.497408  |
| 8                | 1                | 0              | 2.309794                | 1.282372  | 1.105198  |
| 9                | 1                | 0              | -0.575570               | 4.105015  | -1.766551 |
| 10               | 1                | 0              | 1.600825                | 4.962123  | -0.989463 |
| 11               | 8                | 0              | -1.620121               | 1.824031  | -1.133602 |
| 12               | 7                | 0              | 0.084598                | 0.049226  | 0.331192  |
| 13               | 16               | 0              | 0.723139                | -1.148345 | -0.715168 |
| 14               | 8                | 0              | 0.161040                | -2.415107 | -0.262103 |
| 15               | 8                | 0              | 0.501848                | -0.687680 | -2.075992 |
| 16               | 6                | 0              | 2.468444                | -1.166690 | -0.410024 |
| 17               | 6                | 0              | 2.977188                | -1.959362 | 0.616161  |
| 18               | 6                | 0              | 3.302160                | -0.351380 | -1.176034 |
| 19               | 6                | 0              | 4.341961                | -1.922376 | 0.881485  |
| 20               | 1                | 0              | 2.324647                | -2.610461 | 1.187515  |
| 21               | 6                | 0              | 4.661328                | -0.331925 | -0.898438 |
| 22               | 1                | 0              | 2.891769                | 0.254669  | -1.975761 |
| 23               | 6                | 0              | 5.199969                | -1.108978 | 0.135304  |
| 24               | 1                | 0              | 4.745580                | -2.543221 | 1.675725  |
| 25               | 1                | 0              | 5.317535                | 0.296668  | -1.493428 |
| 26               | 6                | 0              | 6.673794                | -1.056046 | 0.432056  |
| 27               | 1                | 0              | 6.936949                | -0.097142 | 0.891821  |
| 28               | 1                | 0              | 6.972990                | -1.852360 | 1.117626  |
| 29               | 1                | 0              | 7.260711                | -1.148199 | -0.486647 |
| 30               | 46               | 0              | -2.146496               | 0.176531  | 0.195561  |
| 31               | 6                | 0              | -2.536207               | 0.100350  | 2.500258  |
| 32               | 6                | 0              | -2.374236               | 1.455060  | 2.483835  |
| 33               | 1                | 0              | -3.499239               | -0.316743 | 2.784853  |
| 34               | 1                | 0              | -3.197880               | 2.106467  | 2.757755  |
| 35               | 1                | 0              | -1.413869               | 1.929774  | 2.300460  |
| 36               | 6                | 0              | -1.580467               | -0.800116 | 1.892283  |
| 37               | 6                | 0              | -0.110581               | -0.402759 | 1.755643  |



|    |   |   |           |           |           |
|----|---|---|-----------|-----------|-----------|
| 38 | 1 | 0 | -1.784760 | -1.865814 | 1.956913  |
| 39 | 1 | 0 | 0.556424  | -1.231375 | 1.997352  |
| 40 | 1 | 0 | 0.157487  | 0.439680  | 2.394981  |
| 41 | 6 | 0 | -4.728803 | -1.622999 | -0.962371 |
| 42 | 7 | 0 | -3.835474 | -1.013581 | -0.555598 |
| 43 | 6 | 0 | -5.851671 | -2.388315 | -1.474950 |
| 44 | 1 | 0 | -5.971431 | -2.187922 | -2.541970 |
| 45 | 1 | 0 | -5.665115 | -3.453616 | -1.322414 |
| 46 | 1 | 0 | -6.761859 | -2.098080 | -0.945394 |

---

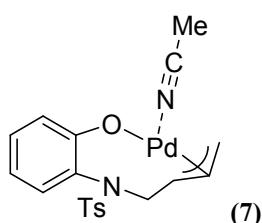

Sum of electronic and zero-point Energies= -1596.594704

Sum of electronic and thermal Energies= -1596.569062

Sum of electronic and thermal Enthalpies= -1596.568117

Sum of electronic and thermal Free Energies= -1596.652483

Standard orientation:

---

| Center<br>Number | Atomic<br>Number | Atomic<br>Type | Coordinates (Angstroms) |           |           |
|------------------|------------------|----------------|-------------------------|-----------|-----------|
|                  |                  |                | X                       | Y         | Z         |
| 1                | 6                | 0              | 1.421732                | 3.461726  | -0.536867 |
| 2                | 6                | 0              | 1.241345                | 2.211975  | 0.042133  |
| 3                | 6                | 0              | 0.108806                | 1.435543  | -0.217892 |
| 4                | 6                | 0              | -0.950616               | 1.926328  | -1.053600 |
| 5                | 6                | 0              | -0.709365               | 3.193043  | -1.653984 |
| 6                | 6                | 0              | 0.434192                | 3.934728  | -1.406005 |
| 7                | 1                | 0              | 2.310368                | 4.046486  | -0.323315 |
| 8                | 1                | 0              | 1.994353                | 1.810633  | 0.715879  |
| 9                | 1                | 0              | -1.481655               | 3.579090  | -2.314297 |
| 10               | 1                | 0              | 0.553552                | 4.902841  | -1.886608 |
| 11               | 8                | 0              | -2.079037               | 1.316624  | -1.289340 |
| 12               | 7                | 0              | 0.033712                | 0.125187  | 0.383782  |
| 13               | 16               | 0              | 0.797208                | -1.129928 | -0.394061 |
| 14               | 8                | 0              | 0.396592                | -2.349070 | 0.302419  |
| 15               | 8                | 0              | 0.559710                | -0.985563 | -1.823408 |
| 16               | 6                | 0              | 2.541174                | -0.908346 | -0.120222 |

|    |    |   |           |           |           |
|----|----|---|-----------|-----------|-----------|
| 17 | 6  | 0 | 3.121468  | -1.418174 | 1.041686  |
| 18 | 6  | 0 | 3.291564  | -0.166563 | -1.028404 |
| 19 | 6  | 0 | 4.465671  | -1.174040 | 1.289179  |
| 20 | 1  | 0 | 2.533526  | -2.011631 | 1.733693  |
| 21 | 6  | 0 | 4.637399  | 0.067335  | -0.764879 |
| 22 | 1  | 0 | 2.830276  | 0.223115  | -1.929043 |
| 23 | 6  | 0 | 5.242026  | -0.425916 | 0.394761  |
| 24 | 1  | 0 | 4.923649  | -1.574836 | 2.189239  |
| 25 | 1  | 0 | 5.225626  | 0.644774  | -1.472104 |
| 26 | 6  | 0 | 6.695511  | -0.166902 | 0.686627  |
| 27 | 1  | 0 | 6.808260  | 0.412678  | 1.608886  |
| 28 | 1  | 0 | 7.236886  | -1.107800 | 0.828356  |
| 29 | 1  | 0 | 7.174752  | 0.385081  | -0.125468 |
| 30 | 46 | 0 | -2.697007 | 0.085922  | 0.384838  |
| 31 | 6  | 0 | -2.733085 | 0.261419  | 2.500988  |
| 32 | 6  | 0 | -2.765837 | 1.544484  | 1.879800  |
| 33 | 1  | 0 | -3.604292 | -0.157139 | 2.996641  |
| 34 | 1  | 0 | -3.685224 | 2.122189  | 1.944677  |
| 35 | 1  | 0 | -1.859763 | 2.140049  | 1.779230  |
| 36 | 6  | 0 | -1.656748 | -0.571381 | 2.128003  |
| 37 | 6  | 0 | -0.248720 | -0.038563 | 1.823084  |
| 38 | 1  | 0 | -1.723213 | -1.628795 | 2.372336  |
| 39 | 1  | 0 | 0.481096  | -0.712931 | 2.276944  |
| 40 | 1  | 0 | -0.112538 | 0.940876  | 2.285699  |
| 41 | 6  | 0 | -2.521920 | -2.666688 | -1.407939 |
| 42 | 7  | 0 | -2.693931 | -1.721398 | -0.770278 |
| 43 | 6  | 0 | -2.285380 | -3.853782 | -2.207578 |
| 44 | 1  | 0 | -1.208976 | -3.982226 | -2.342397 |
| 45 | 1  | 0 | -2.697679 | -4.727667 | -1.698715 |
| 46 | 1  | 0 | -2.763916 | -3.738161 | -3.182421 |

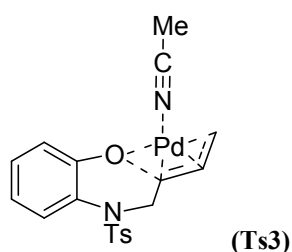

Imaginary Freq.: -285.05 cm<sup>-1</sup>

Sum of electronic and zero-point Energies= -1596.567801

Sum of electronic and thermal Energies= -1596.542173

Sum of electronic and thermal Enthalpies= -1596.541229

Sum of electronic and thermal Free Energies= -1596.627064

Standard orientation:

| Center<br>Number | Atomic<br>Number | Atomic<br>Type | Coordinates (Angstroms) |           |           |
|------------------|------------------|----------------|-------------------------|-----------|-----------|
|                  |                  |                | X                       | Y         | Z         |
| 1                | 6                | 0              | -0.800711               | 2.974114  | -0.022220 |
| 2                | 6                | 0              | -1.181261               | 1.697797  | -0.421192 |
| 3                | 6                | 0              | -0.500678               | 0.577371  | 0.054794  |
| 4                | 6                | 0              | 0.611357                | 0.701743  | 0.920600  |
| 5                | 6                | 0              | 1.001265                | 2.010925  | 1.284827  |
| 6                | 6                | 0              | 0.294641                | 3.117484  | 0.836400  |
| 7                | 1                | 0              | -1.338234               | 3.844363  | -0.383819 |
| 8                | 1                | 0              | -2.013636               | 1.554151  | -1.104210 |
| 9                | 1                | 0              | 1.860971                | 2.126946  | 1.939729  |
| 10               | 1                | 0              | 0.606717                | 4.110133  | 1.150620  |
| 11               | 8                | 0              | 1.252418                | -0.358252 | 1.362526  |
| 12               | 7                | 0              | -0.882936               | -0.735346 | -0.376558 |
| 13               | 16               | 0              | -2.078246               | -1.502578 | 0.525957  |
| 14               | 8                | 0              | -2.202993               | -2.842146 | -0.044723 |
| 15               | 8                | 0              | -1.853299               | -1.372693 | 1.962951  |
| 16               | 6                | 0              | -3.512971               | -0.546581 | 0.112986  |
| 17               | 6                | 0              | -4.079180               | -0.689861 | -1.153627 |
| 18               | 6                | 0              | -4.032801               | 0.347475  | 1.040873  |
| 19               | 6                | 0              | -5.184050               | 0.080059  | -1.485207 |
| 20               | 1                | 0              | -3.661302               | -1.391139 | -1.868591 |
| 21               | 6                | 0              | -5.140219               | 1.114157  | 0.689701  |
| 22               | 1                | 0              | -3.573620               | 0.449068  | 2.017845  |
| 23               | 6                | 0              | -5.728858               | 0.993757  | -0.571222 |
| 24               | 1                | 0              | -5.634862               | -0.026598 | -2.467777 |
| 25               | 1                | 0              | -5.548774               | 1.819167  | 1.407695  |
| 26               | 6                | 0              | -6.932660               | 1.813571  | -0.948637 |
| 27               | 1                | 0              | -7.820510               | 1.177435  | -1.033472 |
| 28               | 1                | 0              | -7.140135               | 2.585637  | -0.203848 |
| 29               | 1                | 0              | -6.787043               | 2.297364  | -1.919210 |
| 30               | 46               | 0              | 3.268573                | -0.584781 | -0.014132 |
| 31               | 6                | 0              | 2.482765                | -2.534458 | -0.160422 |
| 32               | 6                | 0              | 3.206804                | -2.200279 | -1.342640 |
| 33               | 1                | 0              | 2.937350                | -3.212470 | 0.558352  |
| 34               | 1                | 0              | 4.125688                | -2.748179 | -1.537903 |
| 35               | 1                | 0              | 2.698443                | -1.847335 | -2.238631 |
| 36               | 6                | 0              | 1.182246                | -2.050466 | 0.168376  |
| 37               | 6                | 0              | 0.206445                | -1.577147 | -0.868937 |
| 38               | 1                | 0              | 0.736770                | -2.478836 | 1.058267  |
| 39               | 1                | 0              | -0.225365               | -2.476702 | -1.320427 |

|    |   |   |          |           |           |
|----|---|---|----------|-----------|-----------|
| 40 | 1 | 0 | 0.702092 | -1.016372 | -1.663391 |
| 41 | 6 | 0 | 4.885641 | 2.162521  | -0.537220 |
| 42 | 7 | 0 | 4.350843 | 1.148455  | -0.394462 |
| 43 | 6 | 0 | 5.551345 | 3.439475  | -0.717351 |
| 44 | 1 | 0 | 6.293462 | 3.575401  | 0.072467  |
| 45 | 1 | 0 | 6.047146 | 3.458979  | -1.690478 |
| 46 | 1 | 0 | 4.813314 | 4.243171  | -0.666648 |

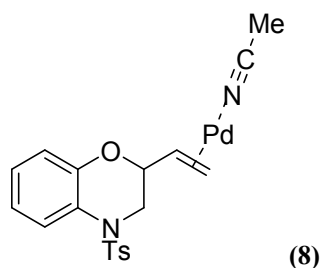

Sum of electronic and zero-point Energies= -1596.606763

Sum of electronic and thermal Energies= -1596.581386

Sum of electronic and thermal Enthalpies= -1596.580442

Sum of electronic and thermal Free Energies= -1596.665069

Standard orientation:

| Center Number | Atomic Number | Atomic Type | Coordinates (Angstroms) |           |           |
|---------------|---------------|-------------|-------------------------|-----------|-----------|
|               |               |             | X                       | Y         | Z         |
| 1             | 6             | 0           | -1.634552               | 3.145906  | -0.239440 |
| 2             | 6             | 0           | -1.722884               | 1.776000  | -0.448023 |
| 3             | 6             | 0           | -0.753763               | 0.913923  | 0.071042  |
| 4             | 6             | 0           | 0.346072                | 1.444803  | 0.760765  |
| 5             | 6             | 0           | 0.443183                | 2.825844  | 0.949718  |
| 6             | 6             | 0           | -0.547897               | 3.667402  | 0.464360  |
| 7             | 1             | 0           | -2.398589               | 3.804215  | -0.638881 |
| 8             | 1             | 0           | -2.541676               | 1.360422  | -1.024810 |
| 9             | 1             | 0           | 1.302010                | 3.220091  | 1.483349  |
| 10            | 1             | 0           | -0.463059               | 4.737572  | 0.624683  |
| 11            | 8             | 0           | 1.366389                | 0.690515  | 1.233710  |
| 12            | 7             | 0           | -0.809248               | -0.498488 | -0.164063 |
| 13            | 16            | 0           | -1.910062               | -1.368494 | 0.799840  |
| 14            | 8             | 0           | -1.698826               | -2.770848 | 0.454858  |
| 15            | 8             | 0           | -1.815168               | -0.969550 | 2.203047  |
| 16            | 6             | 0           | -3.470672               | -0.826431 | 0.170983  |
| 17            | 6             | 0           | -3.836218               | -1.176444 | -1.129430 |

|    |    |   |           |           |           |
|----|----|---|-----------|-----------|-----------|
| 18 | 6  | 0 | -4.292867 | -0.043720 | 0.971866  |
| 19 | 6  | 0 | -5.045418 | -0.717536 | -1.628698 |
| 20 | 1  | 0 | -3.181741 | -1.786090 | -1.743653 |
| 21 | 6  | 0 | -5.504490 | 0.404247  | 0.454185  |
| 22 | 1  | 0 | -3.985684 | 0.219868  | 1.977723  |
| 23 | 6  | 0 | -5.894687 | 0.080378  | -0.847370 |
| 24 | 1  | 0 | -5.337969 | -0.977342 | -2.642017 |
| 25 | 1  | 0 | -6.150734 | 1.021024  | 1.071399  |
| 26 | 6  | 0 | -7.202750 | 0.565955  | -1.409682 |
| 27 | 1  | 0 | -7.052699 | 1.061228  | -2.374052 |
| 28 | 1  | 0 | -7.884891 | -0.273999 | -1.579746 |
| 29 | 1  | 0 | -7.692258 | 1.269192  | -0.731862 |
| 30 | 46 | 0 | 3.852030  | -0.679522 | -0.716832 |
| 31 | 6  | 0 | 2.762062  | -1.205184 | 1.061817  |
| 32 | 6  | 0 | 3.233316  | -2.355948 | 0.434203  |
| 33 | 1  | 0 | 3.317480  | -0.808847 | 1.911566  |
| 34 | 1  | 0 | 4.120272  | -2.851197 | 0.824844  |
| 35 | 1  | 0 | 2.578163  | -2.980480 | -0.171936 |
| 36 | 6  | 0 | 1.329569  | -0.734777 | 1.041684  |
| 37 | 6  | 0 | 0.536628  | -1.088103 | -0.211203 |
| 38 | 1  | 0 | 0.816735  | -1.161332 | 1.914932  |
| 39 | 1  | 0 | 0.449915  | -2.168252 | -0.320131 |
| 40 | 1  | 0 | 1.031892  | -0.686983 | -1.101379 |
| 41 | 6  | 0 | 4.372079  | 1.462549  | -0.632037 |
| 42 | 7  | 0 | 4.487203  | 1.132600  | -1.764944 |
| 43 | 6  | 0 | 4.353812  | 2.298032  | 0.572907  |
| 44 | 1  | 0 | 3.417037  | 2.132247  | 1.107340  |
| 45 | 1  | 0 | 5.184850  | 2.011668  | 1.221540  |
| 46 | 1  | 0 | 4.450567  | 3.349802  | 0.292170  |

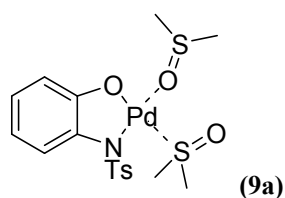

Sum of electronic and zero-point Energies= -2414.195726

Sum of electronic and thermal Energies= -2414.166011

Sum of electronic and thermal Enthalpies= -2414.165067

Sum of electronic and thermal Free Energies= -2414.256705

Standard orientation:

| Center<br>Number | Atomic<br>Number | Atomic<br>Type | Coordinates (Angstroms) |           |           |
|------------------|------------------|----------------|-------------------------|-----------|-----------|
|                  |                  |                | X                       | Y         | Z         |
| 1                | 6                | 0              | -2.687597               | 2.533985  | -2.707221 |
| 2                | 6                | 0              | -1.693448               | 2.692213  | -1.740462 |
| 3                | 6                | 0              | -0.953618               | 1.591349  | -1.321503 |
| 4                | 6                | 0              | -1.167276               | 0.320646  | -1.891277 |
| 5                | 6                | 0              | -2.172738               | 0.169154  | -2.854319 |
| 6                | 6                | 0              | -2.925094               | 1.272205  | -3.251805 |
| 7                | 1                | 0              | -3.266765               | 3.391856  | -3.033679 |
| 8                | 1                | 0              | -1.503612               | 3.660518  | -1.290554 |
| 9                | 1                | 0              | -2.345869               | -0.812701 | -3.285640 |
| 10               | 1                | 0              | -3.697087               | 1.145217  | -4.005790 |
| 11               | 8                | 0              | -0.404023               | -0.701497 | -1.503446 |
| 12               | 7                | 0              | 0.038672                | 1.649683  | -0.274464 |
| 13               | 16               | 0              | -0.643330               | 1.851170  | 1.226675  |
| 14               | 8                | 0              | 0.429016                | 1.708404  | 2.218665  |
| 15               | 46               | 0              | 1.170549                | -0.024898 | -0.444004 |
| 16               | 16               | 0              | 3.091945                | 0.832934  | 0.488579  |
| 17               | 8                | 0              | 4.325611                | 0.519438  | -0.292677 |
| 18               | 6                | 0              | 3.281495                | 0.237333  | 2.163828  |
| 19               | 1                | 0              | 2.390000                | 0.521579  | 2.725239  |
| 20               | 1                | 0              | 3.371857                | -0.848833 | 2.108274  |
| 21               | 1                | 0              | 4.184360                | 0.677548  | 2.593345  |
| 22               | 6                | 0              | 3.030086                | 2.602085  | 0.737236  |
| 23               | 1                | 0              | 2.878172                | 3.064596  | -0.239174 |
| 24               | 1                | 0              | 2.204727                | 2.836324  | 1.408281  |
| 25               | 1                | 0              | 3.991229                | 2.902214  | 1.160927  |
| 26               | 8                | 0              | -1.419944               | 3.090222  | 1.244506  |
| 27               | 6                | 0              | -1.788657               | 0.507841  | 1.474301  |
| 28               | 6                | 0              | -3.066761               | 0.585348  | 0.921655  |
| 29               | 6                | 0              | -1.368861               | -0.637495 | 2.143156  |
| 30               | 6                | 0              | -3.921813               | -0.502838 | 1.040171  |
| 31               | 1                | 0              | -3.389180               | 1.483106  | 0.405489  |
| 32               | 6                | 0              | -2.242455               | -1.713375 | 2.265007  |
| 33               | 1                | 0              | -0.369546               | -0.689407 | 2.562937  |
| 34               | 6                | 0              | -3.525233               | -1.665826 | 1.711733  |
| 35               | 1                | 0              | -4.915658               | -0.447743 | 0.604814  |
| 36               | 1                | 0              | -1.916509               | -2.607440 | 2.789236  |
| 37               | 6                | 0              | -4.475329               | -2.824514 | 1.850553  |
| 38               | 1                | 0              | -4.989233               | -3.026882 | 0.906154  |
| 39               | 1                | 0              | -3.954578               | -3.733074 | 2.163370  |
| 40               | 1                | 0              | -5.244601               | -2.603655 | 2.598867  |
| 41               | 16               | 0              | 1.679924                | -3.236386 | -0.634504 |

|    |   |   |           |           |           |
|----|---|---|-----------|-----------|-----------|
| 42 | 8 | 0 | 2.279852  | -1.799327 | -0.624413 |
| 43 | 6 | 0 | 0.220211  | -3.201610 | 0.409136  |
| 44 | 1 | 0 | -0.224882 | -4.200301 | 0.401150  |
| 45 | 1 | 0 | 0.549959  | -2.954338 | 1.419657  |
| 46 | 1 | 0 | -0.479452 | -2.455477 | 0.025949  |
| 47 | 6 | 0 | 0.892674  | -3.450853 | -2.232831 |
| 48 | 1 | 0 | 1.680169  | -3.451778 | -2.988536 |
| 49 | 1 | 0 | 0.385474  | -4.419325 | -2.228766 |
| 50 | 1 | 0 | 0.190832  | -2.629805 | -2.393347 |

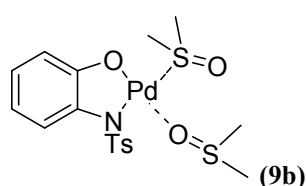

Sum of electronic and zero-point Energies= -2414.185190

Sum of electronic and thermal Energies= -2414.155650

Sum of electronic and thermal Enthalpies= -2414.154705

Sum of electronic and thermal Free Energies= -2414.244936

Standard orientation:

| Center Number | Atomic Number | Atomic Type | Coordinates (Angstroms) |           |           |
|---------------|---------------|-------------|-------------------------|-----------|-----------|
|               |               |             | X                       | Y         | Z         |
| 1             | 6             | 0           | -5.072523               | 0.735206  | -0.130038 |
| 2             | 6             | 0           | -3.872801               | 0.968460  | -0.802924 |
| 3             | 6             | 0           | -2.710745               | 0.289618  | -0.430945 |
| 4             | 6             | 0           | -2.774828               | -0.678616 | 0.591259  |
| 5             | 6             | 0           | -3.981972               | -0.911100 | 1.257237  |
| 6             | 6             | 0           | -5.124979               | -0.199521 | 0.901179  |
| 7             | 1             | 0           | -5.965924               | 1.276287  | -0.426564 |
| 8             | 1             | 0           | -3.831558               | 1.686940  | -1.611285 |
| 9             | 1             | 0           | -4.006297               | -1.657896 | 2.045691  |
| 10            | 1             | 0           | -6.059179               | -0.387930 | 1.422492  |
| 11            | 8             | 0           | -1.676181               | -1.375384 | 0.916826  |
| 12            | 7             | 0           | -1.437100               | 0.406918  | -1.076451 |
| 13            | 16            | 0           | -0.805505               | 1.888466  | -1.388826 |
| 14            | 8             | 0           | 0.093084                | 1.771789  | -2.536122 |
| 15            | 46            | 0           | -0.195570               | -1.064834 | -0.347900 |
| 16            | 16            | 0           | 2.598103                | 0.000891  | -1.543363 |
| 17            | 8             | 0           | 1.356569                | -0.933712 | -1.715137 |

|    |    |   |           |           |           |
|----|----|---|-----------|-----------|-----------|
| 18 | 6  | 0 | 3.076081  | -0.046403 | 0.191710  |
| 19 | 1  | 0 | 3.965174  | 0.580052  | 0.302724  |
| 20 | 1  | 0 | 2.257211  | 0.377651  | 0.777243  |
| 21 | 1  | 0 | 3.283337  | -1.076519 | 0.487235  |
| 22 | 6  | 0 | 3.909670  | -1.030486 | -2.203125 |
| 23 | 1  | 0 | 3.722601  | -1.161800 | -3.270136 |
| 24 | 1  | 0 | 4.863967  | -0.518623 | -2.055350 |
| 25 | 1  | 0 | 3.890073  | -1.991722 | -1.685520 |
| 26 | 8  | 0 | -1.861202 | 2.903138  | -1.465081 |
| 27 | 6  | 0 | 0.225092  | 2.310882  | 0.015966  |
| 28 | 6  | 0 | -0.167577 | 1.976273  | 1.311820  |
| 29 | 6  | 0 | 1.410876  | 3.004487  | -0.205623 |
| 30 | 6  | 0 | 0.650200  | 2.317703  | 2.381598  |
| 31 | 1  | 0 | -1.095122 | 1.441085  | 1.489259  |
| 32 | 6  | 0 | 2.216561  | 3.347035  | 0.877075  |
| 33 | 1  | 0 | 1.712358  | 3.254715  | -1.216973 |
| 34 | 6  | 0 | 1.853933  | 3.005624  | 2.182308  |
| 35 | 1  | 0 | 0.351012  | 2.044165  | 3.389788  |
| 36 | 1  | 0 | 3.149265  | 3.875631  | 0.701079  |
| 37 | 6  | 0 | 2.719483  | 3.381768  | 3.354353  |
| 38 | 1  | 0 | 2.721086  | 2.594085  | 4.113040  |
| 39 | 1  | 0 | 3.751152  | 3.569758  | 3.046176  |
| 40 | 1  | 0 | 2.343367  | 4.293525  | 3.832150  |
| 41 | 16 | 0 | 0.885293  | -2.828842 | 0.687340  |
| 42 | 8  | 0 | 2.247719  | -3.250063 | 0.238642  |
| 43 | 6  | 0 | -0.215717 | -4.236893 | 0.663186  |
| 44 | 1  | 0 | -1.188851 | -3.911700 | 1.035910  |
| 45 | 1  | 0 | -0.299085 | -4.571947 | -0.372220 |
| 46 | 1  | 0 | 0.210294  | -5.022051 | 1.291826  |
| 47 | 6  | 0 | 0.920376  | -2.455259 | 2.436812  |
| 48 | 1  | 0 | 1.580972  | -1.596542 | 2.571990  |
| 49 | 1  | 0 | -0.094895 | -2.203814 | 2.749599  |
| 50 | 1  | 0 | 1.301989  | -3.326446 | 2.973889  |

---

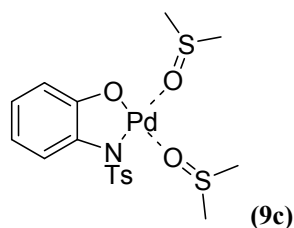

Sum of electronic and zero-point Energies= -2414.194452

Sum of electronic and thermal Energies= -2414.164433



Sum of electronic and thermal Enthalpies= -2414.163489

Sum of electronic and thermal Free Energies= -2414.256530

Standard orientation:

---

| Center<br>Number | Atomic<br>Number | Atomic<br>Type | Coordinates (Angstroms) |           |           |
|------------------|------------------|----------------|-------------------------|-----------|-----------|
|                  |                  |                | X                       | Y         | Z         |
| 1                | 6                | 0              | -4.247971               | 0.987246  | -2.194201 |
| 2                | 6                | 0              | -3.163434               | 1.651252  | -1.620036 |
| 3                | 6                | 0              | -1.978522               | 0.965078  | -1.363579 |
| 4                | 6                | 0              | -1.850690               | -0.390376 | -1.729428 |
| 5                | 6                | 0              | -2.946384               | -1.051253 | -2.300116 |
| 6                | 6                | 0              | -4.136251               | -0.363441 | -2.523082 |
| 7                | 1                | 0              | -5.171384               | 1.524839  | -2.385725 |
| 8                | 1                | 0              | -3.237479               | 2.698070  | -1.348251 |
| 9                | 1                | 0              | -2.845313               | -2.100097 | -2.564601 |
| 10               | 1                | 0              | -4.978392               | -0.884335 | -2.970249 |
| 11               | 8                | 0              | -0.688736               | -1.015629 | -1.532995 |
| 12               | 7                | 0              | -0.823556               | 1.558907  | -0.736530 |
| 13               | 16               | 0              | -1.075401               | 1.984418  | 0.844143  |
| 14               | 8                | 0              | 0.178892                | 2.525531  | 1.372385  |
| 15               | 46               | 0              | 0.723284                | 0.262396  | -0.976026 |
| 16               | 16               | 0              | 2.916802                | 1.487706  | 0.795866  |
| 17               | 8                | 0              | 2.246506                | 1.611475  | -0.607773 |
| 18               | 6                | 0              | 4.559004                | 0.858165  | 0.439050  |
| 19               | 1                | 0              | 5.134001                | 0.835321  | 1.368482  |
| 20               | 1                | 0              | 4.429731                | -0.153814 | 0.051248  |
| 21               | 1                | 0              | 5.044954                | 1.494688  | -0.303918 |
| 22               | 6                | 0              | 3.329619                | 3.181068  | 1.200799  |
| 23               | 1                | 0              | 2.385877                | 3.700747  | 1.365973  |
| 24               | 1                | 0              | 3.929609                | 3.185871  | 2.114371  |
| 25               | 1                | 0              | 3.882101                | 3.626527  | 0.370441  |
| 26               | 8                | 0              | -2.270205               | 2.823413  | 0.952506  |
| 27               | 6                | 0              | -1.415534               | 0.464931  | 1.720007  |
| 28               | 6                | 0              | -2.684443               | -0.103409 | 1.648534  |
| 29               | 6                | 0              | -0.375115               | -0.196311 | 2.370658  |
| 30               | 6                | 0              | -2.902576               | -1.351694 | 2.225998  |
| 31               | 1                | 0              | -3.494002               | 0.417075  | 1.148117  |
| 32               | 6                | 0              | -0.611565               | -1.434634 | 2.951883  |
| 33               | 1                | 0              | 0.609550                | 0.257274  | 2.415208  |
| 34               | 6                | 0              | -1.874673               | -2.035264 | 2.880698  |
| 35               | 1                | 0              | -3.889727               | -1.800872 | 2.163899  |
| 36               | 1                | 0              | 0.198208                | -1.948935 | 3.462696  |
| 37               | 6                | 0              | -2.111973               | -3.379135 | 3.515008  |

---

|    |    |   |           |           |           |
|----|----|---|-----------|-----------|-----------|
| 38 | 1  | 0 | -1.304629 | -4.076558 | 3.271735  |
| 39 | 1  | 0 | -2.147978 | -3.290423 | 4.606540  |
| 40 | 1  | 0 | -3.056819 | -3.816072 | 3.182188  |
| 41 | 16 | 0 | 1.811474  | -2.668098 | -1.318698 |
| 42 | 8  | 0 | 2.241927  | -1.173359 | -1.148213 |
| 43 | 6  | 0 | 3.361667  | -3.525252 | -1.050001 |
| 44 | 1  | 0 | 3.166972  | -4.600638 | -1.062771 |
| 45 | 1  | 0 | 4.032040  | -3.263067 | -1.870125 |
| 46 | 1  | 0 | 3.785467  | -3.218169 | -0.091422 |
| 47 | 6  | 0 | 0.967985  | -3.112345 | 0.202673  |
| 48 | 1  | 0 | 0.013988  | -2.583546 | 0.195759  |
| 49 | 1  | 0 | 0.798392  | -4.192637 | 0.198202  |
| 50 | 1  | 0 | 1.580717  | -2.817426 | 1.057659  |

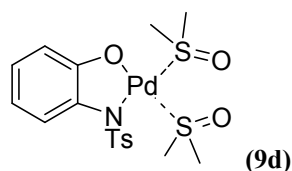

Sum of electronic and zero-point Energies= -2414.191797

Sum of electronic and thermal Energies= -2414.162517

Sum of electronic and thermal Enthalpies= -2414.161573

Sum of electronic and thermal Free Energies= -2414.251469

Standard orientation:

| Center<br>Number | Atomic<br>Number | Atomic<br>Type | Coordinates (Angstroms) |           |           |
|------------------|------------------|----------------|-------------------------|-----------|-----------|
|                  |                  |                | X                       | Y         | Z         |
| 1                | 6                | 0              | 3.424070                | -2.518879 | -2.112919 |
| 2                | 6                | 0              | 2.433284                | -2.638115 | -1.138645 |
| 3                | 6                | 0              | 1.486531                | -1.629229 | -0.979386 |
| 4                | 6                | 0              | 1.495528                | -0.504235 | -1.825465 |
| 5                | 6                | 0              | 2.498697                | -0.387056 | -2.795691 |
| 6                | 6                | 0              | 3.454921                | -1.389528 | -2.931143 |
| 7                | 1                | 0              | 4.163338                | -3.304679 | -2.231510 |
| 8                | 1                | 0              | 2.399777                | -3.501669 | -0.483618 |
| 9                | 1                | 0              | 2.509923                | 0.489846  | -3.436712 |
| 10               | 1                | 0              | 4.224629                | -1.292346 | -3.691735 |
| 11               | 8                | 0              | 0.549364                | 0.429180  | -1.696567 |
| 12               | 7                | 0              | 0.463638                | -1.654915 | 0.038464  |
| 13               | 16               | 0              | 1.069681                | -1.423544 | 1.566809  |

|    |    |   |           |           |           |
|----|----|---|-----------|-----------|-----------|
| 14 | 8  | 0 | -0.070425 | -1.460411 | 2.490665  |
| 15 | 46 | 0 | -0.893271 | -0.185803 | -0.450592 |
| 16 | 16 | 0 | -2.721388 | -1.079882 | 0.629359  |
| 17 | 8  | 0 | -3.957302 | -0.949053 | -0.206372 |
| 18 | 6  | 0 | -2.999812 | -0.339459 | 2.229243  |
| 19 | 1  | 0 | -2.106137 | -0.500560 | 2.833642  |
| 20 | 1  | 0 | -3.167829 | 0.724122  | 2.048789  |
| 21 | 1  | 0 | -3.880105 | -0.805691 | 2.677713  |
| 22 | 6  | 0 | -2.492435 | -2.803291 | 1.035229  |
| 23 | 1  | 0 | -2.320995 | -3.336460 | 0.099024  |
| 24 | 1  | 0 | -1.630534 | -2.893078 | 1.696024  |
| 25 | 1  | 0 | -3.410165 | -3.149876 | 1.515928  |
| 26 | 8  | 0 | 2.174032  | -2.347028 | 1.819817  |
| 27 | 6  | 0 | 1.731775  | 0.231405  | 1.589031  |
| 28 | 6  | 0 | 3.016147  | 0.452312  | 1.096281  |
| 29 | 6  | 0 | 0.913458  | 1.295960  | 1.959015  |
| 30 | 6  | 0 | 3.475530  | 1.757574  | 0.968301  |
| 31 | 1  | 0 | 3.646400  | -0.384622 | 0.814631  |
| 32 | 6  | 0 | 1.390846  | 2.595993  | 1.830426  |
| 33 | 1  | 0 | -0.086649 | 1.113652  | 2.340800  |
| 34 | 6  | 0 | 2.670916  | 2.846165  | 1.324725  |
| 35 | 1  | 0 | 4.475091  | 1.935046  | 0.581123  |
| 36 | 1  | 0 | 0.757209  | 3.427821  | 2.125117  |
| 37 | 6  | 0 | 3.183539  | 4.251360  | 1.160661  |
| 38 | 1  | 0 | 2.461473  | 4.985878  | 1.525567  |
| 39 | 1  | 0 | 4.122387  | 4.391354  | 1.706027  |
| 40 | 1  | 0 | 3.386965  | 4.467036  | 0.106404  |
| 41 | 16 | 0 | -2.128179 | 1.704761  | -0.996125 |
| 42 | 8  | 0 | -2.957350 | 2.286802  | 0.103742  |
| 43 | 6  | 0 | -3.139434 | 1.389285  | -2.433301 |
| 44 | 1  | 0 | -2.495606 | 1.010307  | -3.230604 |
| 45 | 1  | 0 | -3.866784 | 0.630822  | -2.139075 |
| 46 | 1  | 0 | -3.631688 | 2.318358  | -2.729775 |
| 47 | 6  | 0 | -1.005087 | 2.949212  | -1.610727 |
| 48 | 1  | 0 | -0.336814 | 3.218824  | -0.790706 |
| 49 | 1  | 0 | -0.430232 | 2.524088  | -2.433691 |
| 50 | 1  | 0 | -1.597848 | 3.809026  | -1.930165 |

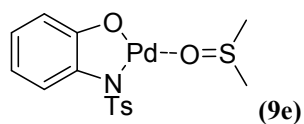

Sum of electronic and zero-point Energies= -1861.086890

Sum of electronic and thermal Energies= -1861.063562

Sum of electronic and thermal Enthalpies= -1861.062618

Sum of electronic and thermal Free Energies= -1861.141050

Standard orientation:

---

| Center<br>Number | Atomic<br>Number | Atomic<br>Type | Coordinates (Angstroms) |           |           |
|------------------|------------------|----------------|-------------------------|-----------|-----------|
|                  |                  |                | X                       | Y         | Z         |
| 1                | 6                | 0              | 2.191938                | -3.672431 | 0.579554  |
| 2                | 6                | 0              | 1.135116                | -2.881341 | 1.028646  |
| 3                | 6                | 0              | 0.618910                | -1.891872 | 0.198289  |
| 4                | 6                | 0              | 1.102370                | -1.717003 | -1.109776 |
| 5                | 6                | 0              | 2.173815                | -2.505405 | -1.547342 |
| 6                | 6                | 0              | 2.710470                | -3.471814 | -0.700069 |
| 7                | 1                | 0              | 2.603709                | -4.440775 | 1.225865  |
| 8                | 1                | 0              | 0.724324                | -3.009949 | 2.023656  |
| 9                | 1                | 0              | 2.564405                | -2.359616 | -2.550121 |
| 10               | 1                | 0              | 3.534885                | -4.085906 | -1.051343 |
| 11               | 8                | 0              | 0.512157                | -0.815351 | -1.898266 |
| 12               | 7                | 0              | -0.427802               | -0.982748 | 0.615877  |
| 13               | 16               | 0              | 0.086313                | 0.126747  | 1.760816  |
| 14               | 8                | 0              | -1.054537               | 0.999858  | 2.044843  |
| 15               | 46               | 0              | -1.151972               | -0.135929 | -1.051661 |
| 16               | 16               | 0              | -3.230436               | 0.428991  | -0.253662 |
| 17               | 8                | 0              | -4.196713               | 0.228829  | -1.380621 |
| 18               | 6                | 0              | -3.377238               | 2.106621  | 0.343564  |
| 19               | 1                | 0              | -2.716016               | 2.228633  | 1.200712  |
| 20               | 1                | 0              | -3.077536               | 2.767274  | -0.472087 |
| 21               | 1                | 0              | -4.422485               | 2.277921  | 0.611489  |
| 22               | 6                | 0              | -3.733492               | -0.524803 | 1.168319  |
| 23               | 1                | 0              | -3.663440               | -1.579325 | 0.897412  |
| 24               | 1                | 0              | -3.054075               | -0.293633 | 1.989434  |
| 25               | 1                | 0              | -4.764415               | -0.253818 | 1.407708  |
| 26               | 8                | 0              | 0.683392                | -0.601742 | 2.875726  |
| 27               | 6                | 0              | 1.362054                | 1.098570  | 0.995750  |
| 28               | 6                | 0              | 2.666503                | 0.609381  | 0.977588  |
| 29               | 6                | 0              | 1.026399                | 2.280643  | 0.340270  |
| 30               | 6                | 0              | 3.642728                | 1.321050  | 0.290770  |
| 31               | 1                | 0              | 2.916605                | -0.310320 | 1.495536  |
| 32               | 6                | 0              | 2.017312                | 2.982489  | -0.335915 |
| 33               | 1                | 0              | 0.005465                | 2.649850  | 0.363630  |
| 34               | 6                | 0              | 3.334646                | 2.510920  | -0.377943 |
| 35               | 1                | 0              | 4.661934                | 0.945672  | 0.275349  |

|    |   |   |          |          |           |
|----|---|---|----------|----------|-----------|
| 36 | 1 | 0 | 1.764591 | 3.911961 | -0.838055 |
| 37 | 6 | 0 | 4.399258 | 3.252514 | -1.139747 |
| 38 | 1 | 0 | 4.560610 | 2.789158 | -2.119669 |
| 39 | 1 | 0 | 4.119592 | 4.295739 | -1.307011 |
| 40 | 1 | 0 | 5.354014 | 3.229420 | -0.606878 |

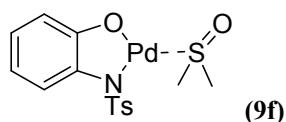

Sum of electronic and zero-point Energies= -1861.086908

Sum of electronic and thermal Energies= -1861.063609

Sum of electronic and thermal Enthalpies= -1861.062665

Sum of electronic and thermal Free Energies= -1861.140782

Standard orientation:

| Center Number | Atomic Number | Atomic Type | Coordinates (Angstroms) |           |           |
|---------------|---------------|-------------|-------------------------|-----------|-----------|
|               |               |             | X                       | Y         | Z         |
| 1             | 6             | 0           | 2.177195                | -3.690224 | 0.574646  |
| 2             | 6             | 0           | 1.123408                | -2.895376 | 1.024109  |
| 3             | 6             | 0           | 0.614352                | -1.900279 | 0.196115  |
| 4             | 6             | 0           | 1.101160                | -1.723426 | -1.110435 |
| 5             | 6             | 0           | 2.169708                | -2.515628 | -1.548300 |
| 6             | 6             | 0           | 2.699607                | -3.487619 | -0.703126 |
| 7             | 1             | 0           | 2.583650                | -4.462914 | 1.219146  |
| 8             | 1             | 0           | 0.709640                | -3.025190 | 2.017737  |
| 9             | 1             | 0           | 2.563302                | -2.368469 | -2.549696 |
| 10            | 1             | 0           | 3.521674                | -4.104701 | -1.054666 |
| 11            | 8             | 0           | 0.516663                | -0.816395 | -1.897020 |
| 12            | 7             | 0           | -0.427880               | -0.987110 | 0.615349  |
| 13            | 16            | 0           | 0.091037                | 0.118387  | 1.762139  |
| 14            | 8             | 0           | -1.049522               | 0.988931  | 2.055131  |
| 15            | 46            | 0           | -1.146445               | -0.132954 | -1.050967 |
| 16            | 16            | 0           | -3.224425               | 0.435276  | -0.254110 |
| 17            | 8             | 0           | -4.190259               | 0.241239  | -1.382456 |
| 18            | 6             | 0           | -3.366721               | 2.111491  | 0.348203  |
| 19            | 1             | 0           | -2.706347               | 2.228571  | 1.206788  |
| 20            | 1             | 0           | -3.063833               | 2.773941  | -0.464802 |
| 21            | 1             | 0           | -4.411762               | 2.285297  | 0.615343  |
| 22            | 6             | 0           | -3.730979               | -0.521080 | 1.164862  |
| 23            | 1             | 0           | -3.664362               | -1.575012 | 0.890798  |

|    |   |   |           |           |           |
|----|---|---|-----------|-----------|-----------|
| 24 | 1 | 0 | -3.050670 | -0.294551 | 1.986600  |
| 25 | 1 | 0 | -4.761036 | -0.247385 | 1.404901  |
| 26 | 8 | 0 | 0.694792  | -0.613777 | 2.870975  |
| 27 | 6 | 0 | 1.361586  | 1.095339  | 0.995153  |
| 28 | 6 | 0 | 2.662677  | 0.601010  | 0.954295  |
| 29 | 6 | 0 | 1.021236  | 2.284602  | 0.353173  |
| 30 | 6 | 0 | 3.633366  | 1.315333  | 0.259968  |
| 31 | 1 | 0 | 2.914744  | -0.327126 | 1.456072  |
| 32 | 6 | 0 | 2.005155  | 2.988122  | -0.328848 |
| 33 | 1 | 0 | 0.000978  | 2.654439  | 0.388949  |
| 34 | 6 | 0 | 3.322100  | 2.513982  | -0.389077 |
| 35 | 1 | 0 | 4.648930  | 0.932082  | 0.221257  |
| 36 | 1 | 0 | 1.748677  | 3.919765  | -0.825229 |
| 37 | 6 | 0 | 4.384800  | 3.298740  | -1.109187 |
| 38 | 1 | 0 | 3.975619  | 3.808244  | -1.985833 |
| 39 | 1 | 0 | 4.805116  | 4.066106  | -0.449069 |
| 40 | 1 | 0 | 5.206263  | 2.654035  | -1.432084 |

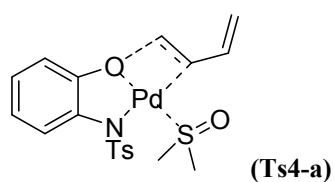

Imaginary Freq.: -312.26 cm<sup>-1</sup>

Sum of electronic and zero-point Energies= -2016.946852

Sum of electronic and thermal Energies= -2016.919461

Sum of electronic and thermal Enthalpies= -2016.918517

Sum of electronic and thermal Free Energies= -2017.004274

Standard orientation:

| Center Number | Atomic Number | Atomic Type | Coordinates (Angstroms) |           |           |
|---------------|---------------|-------------|-------------------------|-----------|-----------|
|               |               |             | X                       | Y         | Z         |
| 1             | 6             | 0           | -2.643313               | -3.624873 | 1.078277  |
| 2             | 6             | 0           | -1.763501               | -3.145909 | 0.107024  |
| 3             | 6             | 0           | -1.039896               | -1.974474 | 0.323197  |
| 4             | 6             | 0           | -1.239372               | -1.263454 | 1.528835  |
| 5             | 6             | 0           | -2.101822               | -1.755078 | 2.505696  |
| 6             | 6             | 0           | -2.804663               | -2.937141 | 2.278018  |
| 7             | 1             | 0           | -3.181431               | -4.551214 | 0.903010  |
| 8             | 1             | 0           | -1.619977               | -3.684825 | -0.822587 |

|    |    |   |           |           |           |
|----|----|---|-----------|-----------|-----------|
| 9  | 1  | 0 | -2.222046 | -1.197099 | 3.429653  |
| 10 | 1  | 0 | -3.477264 | -3.317303 | 3.040883  |
| 11 | 8  | 0 | -0.648852 | -0.047263 | 1.672560  |
| 12 | 7  | 0 | -0.057163 | -1.483150 | -0.600188 |
| 13 | 16 | 0 | -0.662110 | -0.897589 | -2.012016 |
| 14 | 8  | 0 | 0.489201  | -0.495405 | -2.830122 |
| 15 | 8  | 0 | -1.621429 | -1.831261 | -2.605177 |
| 16 | 6  | 0 | -1.557933 | 0.582482  | -1.578194 |
| 17 | 6  | 0 | -0.883270 | 1.801349  | -1.511939 |
| 18 | 6  | 0 | -2.884531 | 0.480015  | -1.174327 |
| 19 | 6  | 0 | -1.550186 | 2.921889  | -1.038046 |
| 20 | 1  | 0 | 0.154157  | 1.871581  | -1.823794 |
| 21 | 6  | 0 | -3.539165 | 1.613043  | -0.696390 |
| 22 | 1  | 0 | -3.401978 | -0.471667 | -1.231337 |
| 23 | 6  | 0 | -2.883910 | 2.843741  | -0.614126 |
| 24 | 1  | 0 | -1.028100 | 3.873630  | -0.987796 |
| 25 | 1  | 0 | -4.575753 | 1.534552  | -0.380969 |
| 26 | 6  | 0 | -3.578901 | 4.067918  | -0.081856 |
| 27 | 1  | 0 | -3.558757 | 4.877896  | -0.818111 |
| 28 | 1  | 0 | -4.621975 | 3.859426  | 0.168284  |
| 29 | 1  | 0 | -3.077665 | 4.436322  | 0.819545  |
| 30 | 46 | 0 | 1.057770  | -0.130916 | 0.576055  |
| 31 | 6  | 0 | 1.775762  | 1.033150  | 2.218054  |
| 32 | 6  | 0 | 0.711171  | 0.542644  | 3.013676  |
| 33 | 1  | 0 | 2.730828  | 0.532835  | 2.377832  |
| 34 | 1  | 0 | 0.830883  | -0.406179 | 3.527488  |
| 35 | 1  | 0 | -0.042453 | 1.211015  | 3.414160  |
| 36 | 6  | 0 | 1.849446  | 2.454299  | 1.802453  |
| 37 | 6  | 0 | 0.825199  | 3.307283  | 1.697629  |
| 38 | 1  | 0 | 2.848632  | 2.797368  | 1.538996  |
| 39 | 1  | 0 | 0.987348  | 4.332863  | 1.380646  |
| 40 | 1  | 0 | -0.199590 | 3.018656  | 1.920620  |
| 41 | 16 | 0 | 3.060078  | -0.223301 | -0.500946 |
| 42 | 8  | 0 | 4.274765  | -0.121761 | 0.366130  |
| 43 | 6  | 0 | 3.125032  | 1.043811  | -1.761724 |
| 44 | 1  | 0 | 2.294829  | 0.873659  | -2.450058 |
| 45 | 1  | 0 | 3.024155  | 2.008623  | -1.261299 |
| 46 | 1  | 0 | 4.087590  | 0.969510  | -2.273649 |
| 47 | 6  | 0 | 3.168583  | -1.707268 | -1.491743 |
| 48 | 1  | 0 | 3.110909  | -2.558699 | -0.811717 |
| 49 | 1  | 0 | 2.328077  | -1.713333 | -2.188102 |
| 50 | 1  | 0 | 4.126952  | -1.694244 | -2.015728 |

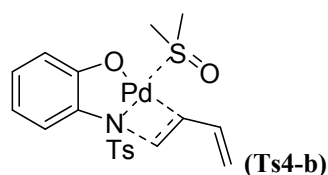

Imaginary Freq.: -273.49 cm<sup>-1</sup>

Sum of electronic and zero-point Energies= -2016.940911

Sum of electronic and thermal Energies= -2016.913060

Sum of electronic and thermal Enthalpies= -2016.912116

Sum of electronic and thermal Free Energies= -2016.999765

Standard orientation:

| Center Number | Atomic Number | Atomic Type | Coordinates (Angstroms) |           |           |
|---------------|---------------|-------------|-------------------------|-----------|-----------|
|               |               |             | X                       | Y         | Z         |
| 1             | 6             | 0           | 2.295429                | 3.050250  | -1.194604 |
| 2             | 6             | 0           | 1.916798                | 1.711050  | -1.140550 |
| 3             | 6             | 0           | 0.748332                | 1.340962  | -0.479552 |
| 4             | 6             | 0           | -0.126347               | 2.312445  | 0.084713  |
| 5             | 6             | 0           | 0.311678                | 3.651535  | 0.075841  |
| 6             | 6             | 0           | 1.493791                | 4.005693  | -0.565635 |
| 7             | 1             | 0           | 3.204887                | 3.341565  | -1.709405 |
| 8             | 1             | 0           | 2.534786                | 0.939412  | -1.590916 |
| 9             | 1             | 0           | -0.318411               | 4.407280  | 0.535793  |
| 10            | 1             | 0           | 1.784909                | 5.052613  | -0.591422 |
| 11            | 8             | 0           | -1.305661               | 1.972079  | 0.561972  |
| 12            | 7             | 0           | 0.391413                | -0.039374 | -0.278669 |
| 13            | 16            | 0           | 1.115918                | -0.746269 | 1.060070  |
| 14            | 8             | 0           | 0.958276                | 0.073789  | 2.259826  |
| 15            | 8             | 0           | 0.658874                | -2.134089 | 1.104599  |
| 16            | 6             | 0           | 2.842576                | -0.744457 | 0.633570  |
| 17            | 6             | 0           | 3.690264                | 0.211107  | 1.182064  |
| 18            | 6             | 0           | 3.311918                | -1.678163 | -0.289409 |
| 19            | 6             | 0           | 5.026753                | 0.231425  | 0.796034  |
| 20            | 1             | 0           | 3.309017                | 0.935427  | 1.893213  |
| 21            | 6             | 0           | 4.647343                | -1.642887 | -0.665042 |
| 22            | 1             | 0           | 2.646933                | -2.426888 | -0.707357 |
| 23            | 6             | 0           | 5.523379                | -0.688217 | -0.131332 |
| 24            | 1             | 0           | 5.692288                | 0.978469  | 1.218861  |
| 25            | 1             | 0           | 5.019021                | -2.368320 | -1.383235 |
| 26            | 6             | 0           | 6.972802                | -0.678482 | -0.533075 |
| 27            | 1             | 0           | 7.085675                | -0.828293 | -1.610757 |



|    |    |   |           |           |           |
|----|----|---|-----------|-----------|-----------|
| 28 | 1  | 0 | 7.456506  | 0.262504  | -0.259788 |
| 29 | 1  | 0 | 7.513151  | -1.490924 | -0.034040 |
| 30 | 46 | 0 | -1.655207 | 0.041687  | -0.153366 |
| 31 | 6  | 0 | -2.269177 | -2.882641 | -0.780944 |
| 32 | 6  | 0 | -1.607645 | -3.875652 | -0.183013 |
| 33 | 1  | 0 | -3.355529 | -2.936221 | -0.835995 |
| 34 | 1  | 0 | -2.147990 | -4.716741 | 0.241486  |
| 35 | 1  | 0 | -0.527509 | -3.877432 | -0.079983 |
| 36 | 6  | 0 | -1.707787 | -1.673970 | -1.430674 |
| 37 | 6  | 0 | -0.330345 | -1.464473 | -1.669225 |
| 38 | 1  | 0 | -2.365187 | -1.234879 | -2.183086 |
| 39 | 1  | 0 | -0.028185 | -0.823427 | -2.490013 |
| 40 | 1  | 0 | 0.404265  | -2.181060 | -1.322789 |
| 41 | 16 | 0 | -3.939658 | 0.172798  | 0.002072  |
| 42 | 8  | 0 | -4.772031 | -0.299924 | -1.146704 |
| 43 | 6  | 0 | -4.426568 | 1.835455  | 0.446095  |
| 44 | 1  | 0 | -3.856671 | 2.147603  | 1.322864  |
| 45 | 1  | 0 | -4.192373 | 2.485005  | -0.398318 |
| 46 | 1  | 0 | -5.500302 | 1.833300  | 0.647113  |
| 47 | 6  | 0 | -4.412819 | -0.717359 | 1.481740  |
| 48 | 1  | 0 | -4.163165 | -1.768408 | 1.324820  |
| 49 | 1  | 0 | -3.847307 | -0.319112 | 2.327613  |
| 50 | 1  | 0 | -5.487255 | -0.594479 | 1.637052  |

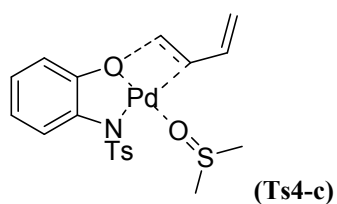

Imaginary Freq.: -331.96 cm<sup>-1</sup>

Sum of electronic and zero-point Energies= -2016.941314

Sum of electronic and thermal Energies= -2016.913184

Sum of electronic and thermal Enthalpies= -2016.912240

Sum of electronic and thermal Free Energies= -2017.000935

Standard orientation:

| Center Number | Atomic Number | Atomic Type | Coordinates (Angstroms) |           |           |
|---------------|---------------|-------------|-------------------------|-----------|-----------|
|               |               |             | X                       | Y         | Z         |
| 1             | 6             | 0           | -2.016207               | -4.112732 | 0.692423  |
| 2             | 6             | 0           | -1.109238               | -3.411808 | -0.102009 |

|    |    |   |           |           |           |
|----|----|---|-----------|-----------|-----------|
| 3  | 6  | 0 | -0.716747 | -2.116410 | 0.238418  |
| 4  | 6  | 0 | -1.287596 | -1.521495 | 1.387288  |
| 5  | 6  | 0 | -2.175980 | -2.229881 | 2.192150  |
| 6  | 6  | 0 | -2.540505 | -3.528733 | 1.843010  |
| 7  | 1  | 0 | -2.290583 | -5.127932 | 0.422562  |
| 8  | 1  | 0 | -0.681991 | -3.869894 | -0.986662 |
| 9  | 1  | 0 | -2.583524 | -1.748067 | 3.076166  |
| 10 | 1  | 0 | -3.231393 | -4.081741 | 2.471958  |
| 11 | 8  | 0 | -1.027990 | -0.207428 | 1.633916  |
| 12 | 7  | 0 | 0.291559  | -1.389084 | -0.469988 |
| 13 | 16 | 0 | -0.087406 | -0.940788 | -1.999316 |
| 14 | 8  | 0 | 1.113017  | -0.325411 | -2.574443 |
| 15 | 8  | 0 | -0.713240 | -2.036160 | -2.745934 |
| 16 | 6  | 0 | -1.314423 | 0.345267  | -1.823633 |
| 17 | 6  | 0 | -0.902266 | 1.671014  | -1.688470 |
| 18 | 6  | 0 | -2.652481 | -0.001096 | -1.672259 |
| 19 | 6  | 0 | -1.840769 | 2.649855  | -1.394405 |
| 20 | 1  | 0 | 0.145505  | 1.927392  | -1.807456 |
| 21 | 6  | 0 | -3.583801 | 0.992622  | -1.377751 |
| 22 | 1  | 0 | -2.966910 | -1.033620 | -1.782879 |
| 23 | 6  | 0 | -3.194137 | 2.325579  | -1.227388 |
| 24 | 1  | 0 | -1.520126 | 3.682550  | -1.285071 |
| 25 | 1  | 0 | -4.630078 | 0.724541  | -1.260419 |
| 26 | 6  | 0 | -4.194587 | 3.401254  | -0.900313 |
| 27 | 1  | 0 | -4.222895 | 4.160005  | -1.689312 |
| 28 | 1  | 0 | -5.200452 | 2.989795  | -0.785126 |
| 29 | 1  | 0 | -3.925702 | 3.912491  | 0.030108  |
| 30 | 46 | 0 | 0.784547  | 0.181916  | 0.868740  |
| 31 | 6  | 0 | 0.830063  | 1.389032  | 2.628320  |
| 32 | 6  | 0 | -0.191026 | 0.586665  | 3.203548  |
| 33 | 1  | 0 | 1.840654  | 1.146608  | 2.957461  |
| 34 | 1  | 0 | 0.087219  | -0.326611 | 3.721235  |
| 35 | 1  | 0 | -1.143152 | 1.019919  | 3.490487  |
| 36 | 6  | 0 | 0.582878  | 2.802379  | 2.264298  |
| 37 | 6  | 0 | -0.602349 | 3.358020  | 1.987139  |
| 38 | 1  | 0 | 1.477554  | 3.419644  | 2.199782  |
| 39 | 1  | 0 | -0.678863 | 4.410528  | 1.731848  |
| 40 | 1  | 0 | -1.529622 | 2.789177  | 2.004107  |
| 41 | 16 | 0 | 3.522041  | -0.224415 | -0.642296 |
| 42 | 8  | 0 | 2.680789  | 0.747972  | 0.245720  |
| 43 | 6  | 0 | 3.992429  | 0.780244  | -2.049229 |
| 44 | 1  | 0 | 4.686903  | 0.205071  | -2.666896 |
| 45 | 1  | 0 | 3.077174  | 0.980809  | -2.605533 |
| 46 | 1  | 0 | 4.457873  | 1.703743  | -1.697920 |

|    |   |   |          |           |           |
|----|---|---|----------|-----------|-----------|
| 47 | 6 | 0 | 5.101461 | -0.280479 | 0.208020  |
| 48 | 1 | 0 | 4.944931 | -0.790293 | 1.160561  |
| 49 | 1 | 0 | 5.800170 | -0.856307 | -0.404549 |
| 50 | 1 | 0 | 5.474147 | 0.733329  | 0.370206  |

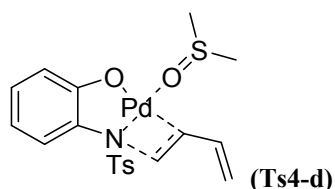

Imaginary Freq.: -292.03 cm<sup>-1</sup>

Sum of electronic and zero-point Energies= -2016.942286

Sum of electronic and thermal Energies= -2016.914421

Sum of electronic and thermal Enthalpies= -2016.913477

Sum of electronic and thermal Free Energies= -2017.001147

Standard orientation:

| Center Number | Atomic Number | Atomic Type | Coordinates (Angstroms) |           |           |
|---------------|---------------|-------------|-------------------------|-----------|-----------|
|               |               |             | X                       | Y         | Z         |
| 1             | 6             | 0           | 2.493984                | 2.940859  | -1.247831 |
| 2             | 6             | 0           | 2.051076                | 1.620947  | -1.205164 |
| 3             | 6             | 0           | 0.811366                | 1.317277  | -0.649413 |
| 4             | 6             | 0           | -0.070494               | 2.336505  | -0.183874 |
| 5             | 6             | 0           | 0.432357                | 3.655019  | -0.173311 |
| 6             | 6             | 0           | 1.682661                | 3.942846  | -0.708712 |
| 7             | 1             | 0           | 3.458852                | 3.180978  | -1.681777 |
| 8             | 1             | 0           | 2.673092                | 0.813810  | -1.582122 |
| 9             | 1             | 0           | -0.200856               | 4.447572  | 0.215481  |
| 10            | 1             | 0           | 2.024637                | 4.974708  | -0.722119 |
| 11            | 8             | 0           | -1.299684               | 2.055675  | 0.178715  |
| 12            | 7             | 0           | 0.377350                | -0.042023 | -0.451870 |
| 13            | 16            | 0           | 0.926405                | -0.724690 | 0.988011  |
| 14            | 8             | 0           | 0.443847                | -2.103479 | 1.017927  |
| 15            | 46            | 0           | -1.640271               | 0.097848  | -0.525156 |
| 16            | 6             | 0           | -2.239976               | -2.808722 | -1.153524 |
| 17            | 6             | 0           | -1.668824               | -3.850816 | -0.545423 |
| 18            | 1             | 0           | -3.324758               | -2.789936 | -1.245064 |
| 19            | 1             | 0           | -2.279293               | -4.656098 | -0.146731 |
| 20            | 1             | 0           | -0.595176               | -3.932097 | -0.409208 |
| 21            | 6             | 0           | -1.577989               | -1.634339 | -1.765693 |

|    |    |   |           |           |           |
|----|----|---|-----------|-----------|-----------|
| 22 | 6  | 0 | -0.179120 | -1.468195 | -1.873304 |
| 23 | 1  | 0 | -2.148499 | -1.174332 | -2.575163 |
| 24 | 1  | 0 | 0.218811  | -0.852202 | -2.672461 |
| 25 | 1  | 0 | 0.500961  | -2.201659 | -1.456490 |
| 26 | 16 | 0 | -4.629292 | 0.198354  | 0.560486  |
| 27 | 8  | 0 | -3.734525 | 0.227811  | -0.708511 |
| 28 | 6  | 0 | -3.969121 | -1.090478 | 1.623418  |
| 29 | 1  | 0 | -4.540064 | -1.089933 | 2.555936  |
| 30 | 1  | 0 | -4.096311 | -2.046647 | 1.113136  |
| 31 | 1  | 0 | -2.909328 | -0.897403 | 1.816465  |
| 32 | 6  | 0 | -4.172770 | 1.624338  | 1.552434  |
| 33 | 1  | 0 | -4.512960 | 2.516742  | 1.024430  |
| 34 | 1  | 0 | -4.687151 | 1.543679  | 2.513680  |
| 35 | 1  | 0 | -3.087569 | 1.653331  | 1.678486  |
| 36 | 8  | 0 | 0.646904  | 0.134601  | 2.137052  |
| 37 | 6  | 0 | 2.689339  | -0.759929 | 0.760135  |
| 38 | 6  | 0 | 3.244422  | -1.735578 | -0.067250 |
| 39 | 6  | 0 | 3.484362  | 0.210356  | 1.358771  |
| 40 | 6  | 0 | 4.612482  | -1.724549 | -0.299076 |
| 41 | 1  | 0 | 2.619736  | -2.498163 | -0.520702 |
| 42 | 6  | 0 | 4.854733  | 0.205666  | 1.117752  |
| 43 | 1  | 0 | 3.037543  | 0.965777  | 1.995488  |
| 44 | 6  | 0 | 5.436819  | -0.753449 | 0.285094  |
| 45 | 1  | 0 | 5.050787  | -2.481063 | -0.943931 |
| 46 | 1  | 0 | 5.479147  | 0.964972  | 1.579434  |
| 47 | 6  | 0 | 6.919120  | -0.763920 | 0.028428  |
| 48 | 1  | 0 | 7.393357  | -1.608726 | 0.540157  |
| 49 | 1  | 0 | 7.131060  | -0.872943 | -1.039535 |
| 50 | 1  | 0 | 7.392329  | 0.154269  | 0.384735  |

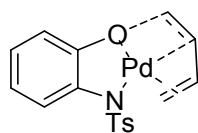

(Ts4-e)

Imaginary Freq.: -344.98 cm<sup>-1</sup>

Sum of electronic and zero-point Energies= -1463.848749

Sum of electronic and thermal Energies= -1463.827975

Sum of electronic and thermal Enthalpies= -1463.827031

Sum of electronic and thermal Free Energies= -1463.899688

Standard orientation:

| Center<br>Number | Atomic<br>Number | Atomic<br>Type | Coordinates (Angstroms) |           |           |
|------------------|------------------|----------------|-------------------------|-----------|-----------|
|                  |                  |                | X                       | Y         | Z         |
| 1                | 6                | 0              | 0.327337                | 4.126158  | -0.252771 |
| 2                | 6                | 0              | 0.315614                | 3.069422  | 0.653566  |
| 3                | 6                | 0              | 0.522854                | 1.752098  | 0.229317  |
| 4                | 6                | 0              | 0.737453                | 1.519502  | -1.152343 |
| 5                | 6                | 0              | 0.777815                | 2.589167  | -2.048886 |
| 6                | 6                | 0              | 0.564991                | 3.889798  | -1.605025 |
| 7                | 1                | 0              | 0.174303                | 5.138955  | 0.107289  |
| 8                | 1                | 0              | 0.153680                | 3.253079  | 1.708947  |
| 9                | 1                | 0              | 0.959872                | 2.377375  | -3.098273 |
| 10               | 1                | 0              | 0.590792                | 4.712848  | -2.312408 |
| 11               | 8                | 0              | 0.836973                | 0.255068  | -1.651014 |
| 12               | 7                | 0              | 0.599086                | 0.657162  | 1.147387  |
| 13               | 16               | 0              | -0.734519               | 0.329821  | 2.041846  |
| 14               | 8                | 0              | -0.390344               | -0.776907 | 2.935775  |
| 15               | 8                | 0              | -1.290453               | 1.545894  | 2.642064  |
| 16               | 6                | 0              | -1.944849               | -0.269099 | 0.870964  |
| 17               | 6                | 0              | -2.023210               | -1.633753 | 0.597213  |
| 18               | 6                | 0              | -2.712962               | 0.644591  | 0.154734  |
| 19               | 6                | 0              | -2.884275               | -2.080832 | -0.396978 |
| 20               | 1                | 0              | -1.416897               | -2.335402 | 1.161574  |
| 21               | 6                | 0              | -3.566604               | 0.181939  | -0.843043 |
| 22               | 1                | 0              | -2.646889               | 1.705265  | 0.373266  |
| 23               | 6                | 0              | -3.665266               | -1.181570 | -1.134121 |
| 24               | 1                | 0              | -2.954891               | -3.145066 | -0.605307 |
| 25               | 1                | 0              | -4.166644               | 0.893463  | -1.403441 |
| 26               | 6                | 0              | -4.608709               | -1.684174 | -2.193497 |
| 27               | 1                | 0              | -4.896916               | -0.886874 | -2.883363 |
| 28               | 1                | 0              | -4.156716               | -2.496251 | -2.770207 |
| 29               | 1                | 0              | -5.524257               | -2.078313 | -1.738033 |
| 30               | 46               | 0              | 1.340031                | -0.937696 | 0.020437  |
| 31               | 6                | 0              | 2.943036                | -2.391200 | -0.118133 |
| 32               | 6                | 0              | 3.217704                | -1.532384 | 0.956171  |
| 33               | 1                | 0              | 2.791763                | -3.450794 | 0.069948  |
| 34               | 1                | 0              | 3.293567                | -1.966115 | 1.948413  |
| 35               | 1                | 0              | 3.717943                | -0.576114 | 0.814283  |
| 36               | 6                | 0              | 2.527814                | -1.928352 | -1.411640 |
| 37               | 6                | 0              | 2.622456                | -0.585864 | -1.947296 |
| 38               | 1                | 0              | 2.116046                | -2.680385 | -2.078519 |
| 39               | 1                | 0              | 2.450700                | -0.467854 | -3.008840 |
| 40               | 1                | 0              | 3.275204                | 0.153803  | -1.490666 |

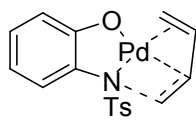

(Ts4-f)

Imaginary Freq.: -327.71 cm<sup>-1</sup>

Sum of electronic and zero-point Energies= -1463.857146

Sum of electronic and thermal Energies= -1463.836292

Sum of electronic and thermal Enthalpies= -1463.835348

Sum of electronic and thermal Free Energies= -1463.908376

Standard orientation:

| Center Number | Atomic Number | Atomic Type | Coordinates (Angstroms) |           |           |
|---------------|---------------|-------------|-------------------------|-----------|-----------|
|               |               |             | X                       | Y         | Z         |
| 1             | 6             | 0           | -0.415368               | 4.056883  | 0.107765  |
| 2             | 6             | 0           | 0.155224                | 2.978569  | 0.772557  |
| 3             | 6             | 0           | 0.334381                | 1.756712  | 0.119417  |
| 4             | 6             | 0           | 0.016833                | 1.610264  | -1.262802 |
| 5             | 6             | 0           | -0.596343               | 2.709985  | -1.900833 |
| 6             | 6             | 0           | -0.801966               | 3.905177  | -1.227984 |
| 7             | 1             | 0           | -0.559286               | 5.001796  | 0.621300  |
| 8             | 1             | 0           | 0.443145                | 3.059827  | 1.814921  |
| 9             | 1             | 0           | -0.873640               | 2.604143  | -2.945740 |
| 10            | 1             | 0           | -1.256051               | 4.739888  | -1.755396 |
| 11            | 8             | 0           | 0.299309                | 0.515015  | -1.939128 |
| 12            | 7             | 0           | 0.792868                | 0.592245  | 0.820940  |
| 13            | 16            | 0           | -0.241564               | -0.040836 | 1.977624  |
| 14            | 8             | 0           | 0.445835                | -1.178597 | 2.582206  |
| 15            | 8             | 0           | -0.717813               | 1.024368  | 2.854112  |
| 16            | 6             | 0           | -1.624769               | -0.630173 | 1.029594  |
| 17            | 6             | 0           | -1.626821               | -1.949502 | 0.578171  |
| 18            | 6             | 0           | -2.630859               | 0.258140  | 0.665292  |
| 19            | 6             | 0           | -2.658676               | -2.377861 | -0.244260 |
| 20            | 1             | 0           | -0.832933               | -2.629898 | 0.869393  |
| 21            | 6             | 0           | -3.654084               | -0.187376 | -0.167333 |
| 22            | 1             | 0           | -2.618587               | 1.282253  | 1.022775  |
| 23            | 6             | 0           | -3.682964               | -1.503593 | -0.634585 |
| 24            | 1             | 0           | -2.671854               | -3.407039 | -0.592299 |
| 25            | 1             | 0           | -4.440989               | 0.502968  | -0.456525 |
| 26            | 6             | 0           | -4.789035               | -1.989533 | -1.531423 |
| 27            | 1             | 0           | -5.359956               | -2.787068 | -1.044092 |
| 28            | 1             | 0           | -5.480642               | -1.183783 | -1.788571 |

|    |    |   |           |           |           |
|----|----|---|-----------|-----------|-----------|
| 29 | 1  | 0 | -4.383206 | -2.403945 | -2.459860 |
| 30 | 46 | 0 | 1.425716  | -0.684917 | -0.704162 |
| 31 | 6  | 0 | 2.850608  | -1.371704 | 0.683386  |
| 32 | 6  | 0 | 2.759141  | -0.005684 | 1.139377  |
| 33 | 1  | 0 | 2.585263  | -2.131113 | 1.411159  |
| 34 | 1  | 0 | 2.650903  | 0.147425  | 2.204565  |
| 35 | 1  | 0 | 3.243398  | 0.802914  | 0.598995  |
| 36 | 6  | 0 | 3.267048  | -1.857557 | -0.606878 |
| 37 | 6  | 0 | 3.371803  | -1.063052 | -1.745186 |
| 38 | 1  | 0 | 3.269092  | -2.938920 | -0.715219 |
| 39 | 1  | 0 | 3.479506  | -1.551001 | -2.708674 |
| 40 | 1  | 0 | 3.674298  | -0.019076 | -1.697027 |

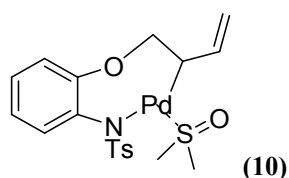

Sum of electronic and zero-point Energies= -2016.967280

Sum of electronic and thermal Energies= -2016.939561

Sum of electronic and thermal Enthalpies= -2016.938617

Sum of electronic and thermal Free Energies= -2017.026028

Standard orientation:

| Center Number | Atomic Number | Atomic Type | Coordinates (Angstroms) |           |           |
|---------------|---------------|-------------|-------------------------|-----------|-----------|
|               |               |             | X                       | Y         | Z         |
| 1             | 6             | 0           | 2.900636                | -3.567516 | -0.751296 |
| 2             | 6             | 0           | 1.960001                | -3.083560 | 0.154904  |
| 3             | 6             | 0           | 1.187685                | -1.955048 | -0.137814 |
| 4             | 6             | 0           | 1.415520                | -1.329809 | -1.383066 |
| 5             | 6             | 0           | 2.339379                | -1.807750 | -2.298421 |
| 6             | 6             | 0           | 3.085092                | -2.941037 | -1.980705 |
| 7             | 1             | 0           | 3.478257                | -4.451467 | -0.499446 |
| 8             | 1             | 0           | 1.802007                | -3.581577 | 1.104709  |
| 9             | 1             | 0           | 2.475533                | -1.292612 | -3.244408 |
| 10            | 1             | 0           | 3.807485                | -3.325556 | -2.693245 |
| 11            | 8             | 0           | 0.722110                | -0.148872 | -1.631466 |
| 12            | 7             | 0           | 0.156726                | -1.488000 | 0.730670  |
| 13            | 16            | 0           | 0.626631                | -0.809233 | 2.130468  |
| 14            | 8             | 0           | -0.600040               | -0.514869 | 2.884842  |

|    |    |   |           |           |           |
|----|----|---|-----------|-----------|-----------|
| 15 | 8  | 0 | 1.669955  | -1.585085 | 2.808268  |
| 16 | 6  | 0 | 1.358239  | 0.754318  | 1.664609  |
| 17 | 6  | 0 | 0.570673  | 1.904389  | 1.628302  |
| 18 | 6  | 0 | 2.667876  | 0.777637  | 1.194088  |
| 19 | 6  | 0 | 1.100386  | 3.078397  | 1.110790  |
| 20 | 1  | 0 | -0.448455 | 1.878576  | 1.999091  |
| 21 | 6  | 0 | 3.184108  | 1.961610  | 0.672672  |
| 22 | 1  | 0 | 3.279431  | -0.118149 | 1.229563  |
| 23 | 6  | 0 | 2.409615  | 3.123030  | 0.614931  |
| 24 | 1  | 0 | 0.487552  | 3.975468  | 1.083745  |
| 25 | 1  | 0 | 4.205034  | 1.979668  | 0.301490  |
| 26 | 6  | 0 | 2.952612  | 4.399631  | 0.031802  |
| 27 | 1  | 0 | 2.343979  | 4.725981  | -0.818614 |
| 28 | 1  | 0 | 2.934207  | 5.205847  | 0.772411  |
| 29 | 1  | 0 | 3.981877  | 4.276259  | -0.314094 |
| 30 | 46 | 0 | -1.066117 | -0.213071 | -0.551481 |
| 31 | 6  | 0 | -1.347043 | 0.694882  | -2.358698 |
| 32 | 6  | 0 | -0.047340 | 0.079482  | -2.880395 |
| 33 | 1  | 0 | -2.233438 | 0.299736  | -2.855029 |
| 34 | 1  | 0 | -0.212766 | -0.885734 | -3.363512 |
| 35 | 1  | 0 | 0.549986  | 0.727998  | -3.526799 |
| 36 | 6  | 0 | -1.379945 | 2.159897  | -2.161195 |
| 37 | 6  | 0 | -0.318764 | 2.975714  | -2.108505 |
| 38 | 1  | 0 | -2.373247 | 2.582627  | -2.014268 |
| 39 | 1  | 0 | -0.442830 | 4.040669  | -1.937501 |
| 40 | 1  | 0 | 0.698938  | 2.613310  | -2.231910 |
| 41 | 16 | 0 | -3.160628 | -0.224825 | 0.248365  |
| 42 | 8  | 0 | -4.320247 | -0.081196 | -0.683320 |
| 43 | 6  | 0 | -3.280567 | 1.005691  | 1.545327  |
| 44 | 1  | 0 | -2.497770 | 0.795606  | 2.278670  |
| 45 | 1  | 0 | -3.135090 | 1.986147  | 1.088739  |
| 46 | 1  | 0 | -4.273202 | 0.932439  | 1.996764  |
| 47 | 6  | 0 | -3.351654 | -1.720877 | 1.214619  |
| 48 | 1  | 0 | -3.278399 | -2.567180 | 0.529737  |
| 49 | 1  | 0 | -2.543263 | -1.752318 | 1.949242  |
| 50 | 1  | 0 | -4.330836 | -1.697840 | 1.698489  |

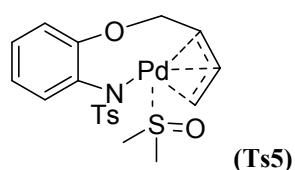



Imaginary Freq.: -73.39 cm<sup>-1</sup>

Sum of electronic and zero-point Energies= -2016.956126

Sum of electronic and thermal Energies= -2016.928856

Sum of electronic and thermal Enthalpies= -2016.927912

Sum of electronic and thermal Free Energies= -2017.014741

Standard orientation:

| Center<br>Number | Atomic<br>Number | Atomic<br>Type | Coordinates (Angstroms) |           |           |
|------------------|------------------|----------------|-------------------------|-----------|-----------|
|                  |                  |                | X                       | Y         | Z         |
| 1                | 6                | 0              | -0.138266               | 4.341219  | -0.615046 |
| 2                | 6                | 0              | -0.036463               | 3.343110  | 0.350127  |
| 3                | 6                | 0              | -0.036383               | 1.986210  | 0.003420  |
| 4                | 6                | 0              | -0.152275               | 1.673615  | -1.372317 |
| 5                | 6                | 0              | -0.242572               | 2.666315  | -2.340117 |
| 6                | 6                | 0              | -0.230502               | 4.006952  | -1.963272 |
| 7                | 1                | 0              | -0.128532               | 5.383417  | -0.310871 |
| 8                | 1                | 0              | 0.055229                | 3.598703  | 1.399663  |
| 9                | 1                | 0              | -0.334462               | 2.381871  | -3.384202 |
| 10               | 1                | 0              | -0.297903               | 4.780773  | -2.721201 |
| 11               | 8                | 0              | -0.244245               | 0.343153  | -1.735682 |
| 12               | 7                | 0              | 0.161420                | 0.964081  | 0.971629  |
| 13               | 16               | 0              | -1.000281               | 0.704019  | 2.061746  |
| 14               | 8                | 0              | -0.477738               | -0.264064 | 3.031686  |
| 15               | 8                | 0              | -1.556341               | 1.958951  | 2.585866  |
| 16               | 6                | 0              | -2.341244               | -0.101864 | 1.192225  |
| 17               | 6                | 0              | -2.546155               | -1.468652 | 1.337083  |
| 18               | 6                | 0              | -3.138079               | 0.644784  | 0.322107  |
| 19               | 6                | 0              | -3.560150               | -2.091949 | 0.612203  |
| 20               | 1                | 0              | -1.920457               | -2.038895 | 2.015343  |
| 21               | 6                | 0              | -4.134177               | 0.007976  | -0.405889 |
| 22               | 1                | 0              | -2.985399               | 1.714285  | 0.218924  |
| 23               | 6                | 0              | -4.362220               | -1.368503 | -0.272258 |
| 24               | 1                | 0              | -3.724152               | -3.158934 | 0.735441  |
| 25               | 1                | 0              | -4.754419               | 0.589501  | -1.082933 |
| 26               | 6                | 0              | -5.449891               | -2.038533 | -1.069140 |
| 27               | 1                | 0              | -6.418723               | -1.560594 | -0.890909 |
| 28               | 1                | 0              | -5.247495               | -1.964648 | -2.143103 |
| 29               | 1                | 0              | -5.539377               | -3.097431 | -0.813943 |
| 30               | 46               | 0              | 1.153005                | -0.652269 | -0.121728 |
| 31               | 6                | 0              | 1.365641                | -1.414361 | -1.984310 |
| 32               | 6                | 0              | 0.702265                | -0.226766 | -2.683219 |
| 33               | 1                | 0              | 2.367404                | -1.630370 | -2.352309 |
| 34               | 1                | 0              | 1.447948                | 0.525617  | -2.951779 |

|    |    |   |           |           |           |
|----|----|---|-----------|-----------|-----------|
| 35 | 1  | 0 | 0.152107  | -0.528748 | -3.580614 |
| 36 | 6  | 0 | 0.562791  | -2.579601 | -1.615231 |
| 37 | 6  | 0 | -0.774482 | -2.565349 | -1.420777 |
| 38 | 1  | 0 | 1.118621  | -3.484334 | -1.377370 |
| 39 | 1  | 0 | -1.281826 | -3.450947 | -1.052030 |
| 40 | 1  | 0 | -1.387874 | -1.700525 | -1.653714 |
| 41 | 16 | 0 | 3.317292  | -0.866703 | 0.481748  |
| 42 | 8  | 0 | 3.939363  | -2.227650 | 0.520031  |
| 43 | 6  | 0 | 3.519258  | -0.087841 | 2.083926  |
| 44 | 1  | 0 | 3.129153  | 0.931041  | 2.029715  |
| 45 | 1  | 0 | 2.942079  | -0.668580 | 2.805175  |
| 46 | 1  | 0 | 4.580364  | -0.092584 | 2.343917  |
| 47 | 6  | 0 | 4.342435  | 0.208629  | -0.522894 |
| 48 | 1  | 0 | 4.305956  | -0.166932 | -1.546885 |
| 49 | 1  | 0 | 3.930395  | 1.219671  | -0.479704 |
| 50 | 1  | 0 | 5.365531  | 0.181911  | -0.139381 |

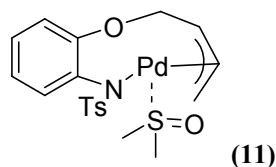

Sum of electronic and zero-point Energies= -2016.979215

Sum of electronic and thermal Energies= -2016.951998

Sum of electronic and thermal Enthalpies= -2016.951054

Sum of electronic and thermal Free Energies= -2017.036087

Standard orientation:

| Center Number | Atomic Number | Atomic Type | Coordinates (Angstroms) |          |           |
|---------------|---------------|-------------|-------------------------|----------|-----------|
|               |               |             | X                       | Y        | Z         |
| 1             | 6             | 0           | -1.522784               | 3.809326 | 0.455348  |
| 2             | 6             | 0           | -1.032646               | 2.842195 | -0.414907 |
| 3             | 6             | 0           | -0.508256               | 1.622999 | 0.045502  |
| 4             | 6             | 0           | -0.486655               | 1.418666 | 1.447081  |
| 5             | 6             | 0           | -0.990278               | 2.386271 | 2.315335  |
| 6             | 6             | 0           | -1.513792               | 3.578804 | 1.828642  |
| 7             | 1             | 0           | -1.928209               | 4.734057 | 0.056152  |
| 8             | 1             | 0           | -1.061796               | 3.005565 | -1.486209 |
| 9             | 1             | 0           | -0.954004               | 2.192903 | 3.383715  |
| 10            | 1             | 0           | -1.901852               | 4.321377 | 2.518704  |
| 11            | 8             | 0           | 0.075985                | 0.283222 | 1.986182  |

|    |    |   |           |           |           |
|----|----|---|-----------|-----------|-----------|
| 12 | 7  | 0 | -0.161322 | 0.600133  | -0.869711 |
| 13 | 16 | 0 | 1.066951  | 0.790518  | -1.886897 |
| 14 | 8  | 0 | 0.937123  | -0.230894 | -2.932679 |
| 15 | 8  | 0 | 1.216958  | 2.188480  | -2.316450 |
| 16 | 6  | 0 | 2.554971  | 0.394799  | -0.973506 |
| 17 | 6  | 0 | 3.315795  | -0.713299 | -1.322485 |
| 18 | 6  | 0 | 2.912017  | 1.179233  | 0.124904  |
| 19 | 6  | 0 | 4.433648  | -1.047883 | -0.560318 |
| 20 | 1  | 0 | 3.028167  | -1.315887 | -2.177072 |
| 21 | 6  | 0 | 4.023750  | 0.831668  | 0.879610  |
| 22 | 1  | 0 | 2.325996  | 2.052769  | 0.393309  |
| 23 | 6  | 0 | 4.800283  | -0.288694 | 0.552002  |
| 24 | 1  | 0 | 5.025610  | -1.916776 | -0.835269 |
| 25 | 1  | 0 | 4.298534  | 1.439466  | 1.737958  |
| 26 | 6  | 0 | 6.003089  | -0.649360 | 1.382500  |
| 27 | 1  | 0 | 5.725175  | -0.812485 | 2.429004  |
| 28 | 1  | 0 | 6.483369  | -1.558702 | 1.012610  |
| 29 | 1  | 0 | 6.745264  | 0.155933  | 1.368082  |
| 30 | 46 | 0 | -0.864884 | -1.312679 | -0.099565 |
| 31 | 6  | 0 | -1.041049 | -1.937695 | 1.963162  |
| 32 | 6  | 0 | -0.781664 | -0.620089 | 2.684436  |
| 33 | 1  | 0 | -1.944167 | -2.436256 | 2.311904  |
| 34 | 1  | 0 | -1.742810 | -0.143325 | 2.898098  |
| 35 | 1  | 0 | -0.304031 | -0.851905 | 3.643898  |
| 36 | 6  | 0 | -0.091752 | -2.742631 | 1.301120  |
| 37 | 6  | 0 | 0.975533  | -2.113482 | 0.610471  |
| 38 | 1  | 0 | -0.345977 | -3.779618 | 1.096028  |
| 39 | 1  | 0 | 1.555935  | -2.715813 | -0.083718 |
| 40 | 1  | 0 | 1.480110  | -1.250309 | 1.030570  |
| 41 | 16 | 0 | -3.131159 | -0.816580 | -0.533983 |
| 42 | 8  | 0 | -4.045184 | -1.996854 | -0.692746 |
| 43 | 6  | 0 | -3.251217 | 0.203739  | -2.003188 |
| 44 | 1  | 0 | -2.685060 | 1.122764  | -1.840884 |
| 45 | 1  | 0 | -2.815031 | -0.358187 | -2.830861 |
| 46 | 1  | 0 | -4.305444 | 0.417425  | -2.194136 |
| 47 | 6  | 0 | -3.844227 | 0.309164  | 0.668176  |
| 48 | 1  | 0 | -3.812914 | -0.183620 | 1.641300  |
| 49 | 1  | 0 | -3.255500 | 1.229532  | 0.691765  |
| 50 | 1  | 0 | -4.877761 | 0.516368  | 0.379358  |

---

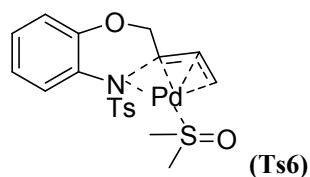

Imaginary Freq.: -315.63 cm<sup>-1</sup>

Sum of electronic and zero-point Energies= -2016.954090

Sum of electronic and thermal Energies= -2016.927195

Sum of electronic and thermal Enthalpies= -2016.926250

Sum of electronic and thermal Free Energies= -2017.012222

Standard orientation:

| Center Number | Atomic Number | Atomic Type | Coordinates (Angstroms) |           |           |
|---------------|---------------|-------------|-------------------------|-----------|-----------|
|               |               |             | X                       | Y         | Z         |
| 1             | 7             | 0           | 0.103287                | -0.165524 | -0.197164 |
| 2             | 6             | 0           | 0.076248                | -1.529514 | 1.376843  |
| 3             | 6             | 0           | 0.011215                | 2.271647  | -0.602259 |
| 4             | 6             | 0           | 1.002188                | 1.404804  | 1.417586  |
| 5             | 6             | 0           | 1.321148                | 2.698581  | 1.820500  |
| 6             | 6             | 0           | 1.005157                | 3.776880  | 1.000293  |
| 7             | 1             | 0           | 0.079267                | 4.403804  | -0.843150 |
| 8             | 1             | 0           | -0.493245               | 2.092604  | -1.545158 |
| 9             | 1             | 0           | 1.820234                | 2.841258  | 2.773577  |
| 10            | 1             | 0           | 1.261689                | 4.784243  | 1.312724  |
| 11            | 8             | 0           | 1.339698                | 0.363723  | 2.236446  |
| 12            | 6             | 0           | 0.341985                | 3.563924  | -0.207769 |
| 13            | 16            | 0           | 0.934469                | -0.743784 | -1.486051 |
| 14            | 8             | 0           | 0.615845                | -2.169334 | -1.577486 |
| 15            | 8             | 0           | 0.718119                | 0.089400  | -2.671398 |
| 16            | 6             | 0           | 2.649450                | -0.585496 | -1.029479 |
| 17            | 6             | 0           | 3.320350                | -1.680539 | -0.493141 |
| 18            | 6             | 0           | 3.280275                | 0.654642  | -1.137307 |
| 19            | 6             | 0           | 4.630799                | -1.527187 | -0.051078 |
| 20            | 1             | 0           | 2.828489                | -2.645553 | -0.431593 |
| 21            | 6             | 0           | 4.586195                | 0.791869  | -0.685323 |
| 22            | 1             | 0           | 2.760227                | 1.501896  | -1.571301 |
| 23            | 6             | 0           | 5.278390                | -0.291531 | -0.130282 |
| 24            | 1             | 0           | 5.155921                | -2.383442 | 0.362357  |
| 25            | 1             | 0           | 5.078885                | 1.756725  | -0.766837 |
| 26            | 6             | 0           | 6.682313                | -0.116474 | 0.381989  |
| 27            | 1             | 0           | 6.679451                | 0.426454  | 1.333818  |
| 28            | 1             | 0           | 7.170221                | -1.080192 | 0.548436  |
| 29            | 1             | 0           | 7.290058                | 0.462470  | -0.319840 |

|    |    |   |           |           |           |
|----|----|---|-----------|-----------|-----------|
| 30 | 46 | 0 | -2.034758 | -0.914929 | 0.206398  |
| 31 | 6  | 0 | 0.362050  | 1.173603  | 0.190787  |
| 32 | 6  | 0 | 0.274486  | -0.539588 | 2.484942  |
| 33 | 1  | 0 | 1.003492  | -1.949566 | 1.004564  |
| 34 | 1  | 0 | -0.644320 | 0.009265  | 2.719377  |
| 35 | 1  | 0 | 0.560711  | -1.118004 | 3.370181  |
| 36 | 6  | 0 | -1.049892 | -2.420473 | 1.328926  |
| 37 | 6  | 0 | -2.321678 | -2.180131 | 1.908063  |
| 38 | 1  | 0 | -0.902546 | -3.329713 | 0.752061  |
| 39 | 1  | 0 | -2.447218 | -1.489528 | 2.740073  |
| 40 | 1  | 0 | -3.048564 | -2.987298 | 1.874953  |
| 41 | 16 | 0 | -3.778384 | 0.431202  | -0.461905 |
| 42 | 8  | 0 | -5.206590 | -0.005188 | -0.284030 |
| 43 | 6  | 0 | -3.570661 | 0.927930  | -2.177830 |
| 44 | 1  | 0 | -2.576744 | 1.363301  | -2.304934 |
| 45 | 1  | 0 | -3.661973 | 0.031061  | -2.793157 |
| 46 | 1  | 0 | -4.348083 | 1.650820  | -2.437239 |
| 47 | 6  | 0 | -3.590834 | 2.044323  | 0.310715  |
| 48 | 1  | 0 | -3.728313 | 1.908682  | 1.385027  |
| 49 | 1  | 0 | -2.583356 | 2.420047  | 0.112169  |
| 50 | 1  | 0 | -4.347457 | 2.724932  | -0.088267 |

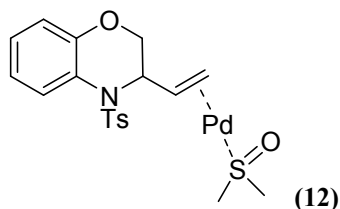

Sum of electronic and zero-point Energies= -2016.995547

Sum of electronic and thermal Energies= -2016.968398

Sum of electronic and thermal Enthalpies= -2016.967454

Sum of electronic and thermal Free Energies= -2017.054466

Standard orientation:

| Center Number | Atomic Number | Atomic Type | Coordinates (Angstroms) |           |           |
|---------------|---------------|-------------|-------------------------|-----------|-----------|
|               |               |             | X                       | Y         | Z         |
| 1             | 6             | 0           | 5.119919                | -1.508210 | 0.729801  |
| 2             | 6             | 0           | 3.783376                | -1.734705 | 1.031061  |
| 3             | 6             | 0           | 2.786934                | -1.358197 | 0.131920  |
| 4             | 6             | 0           | 3.132615                | -0.798995 | -1.106839 |
| 5             | 6             | 0           | 4.478963                | -0.584889 | -1.411995 |
| 6             | 6             | 0           | 5.461120                | -0.924807 | -0.492085 |
| 7             | 1             | 0           | 5.890303                | -1.792441 | 1.438392  |

|    |    |   |           |           |           |
|----|----|---|-----------|-----------|-----------|
| 8  | 1  | 0 | 3.490385  | -2.186729 | 1.971312  |
| 9  | 1  | 0 | 4.731271  | -0.144949 | -2.371130 |
| 10 | 1  | 0 | 6.503625  | -0.744829 | -0.735562 |
| 11 | 8  | 0 | 2.224960  | -0.450676 | -2.045405 |
| 12 | 7  | 0 | 1.391883  | -1.544983 | 0.427398  |
| 13 | 16 | 0 | 0.822915  | -0.390585 | 1.536749  |
| 14 | 8  | 0 | -0.621476 | -0.572377 | 1.711022  |
| 15 | 8  | 0 | 1.664927  | -0.528444 | 2.713778  |
| 16 | 6  | 0 | 1.114319  | 1.216818  | 0.840720  |
| 17 | 6  | 0 | 0.087313  | 1.879487  | 0.172145  |
| 18 | 6  | 0 | 2.386165  | 1.778294  | 0.941992  |
| 19 | 6  | 0 | 0.340295  | 3.115237  | -0.404997 |
| 20 | 1  | 0 | -0.896555 | 1.429189  | 0.094450  |
| 21 | 6  | 0 | 2.622833  | 3.014797  | 0.352656  |
| 22 | 1  | 0 | 3.178309  | 1.265171  | 1.476347  |
| 23 | 6  | 0 | 1.611444  | 3.697539  | -0.330478 |
| 24 | 1  | 0 | -0.462076 | 3.635357  | -0.920647 |
| 25 | 1  | 0 | 3.611030  | 3.458004  | 0.430371  |
| 26 | 6  | 0 | 1.882546  | 5.019269  | -0.993996 |
| 27 | 1  | 0 | 2.028780  | 4.879894  | -2.070973 |
| 28 | 1  | 0 | 1.042832  | 5.707780  | -0.864600 |
| 29 | 1  | 0 | 2.784084  | 5.489224  | -0.593410 |
| 30 | 46 | 0 | -2.158862 | -0.928256 | -0.150098 |
| 31 | 6  | 0 | 0.677332  | -1.916962 | -0.831366 |
| 32 | 6  | 0 | 0.853060  | -0.827486 | -1.879241 |
| 33 | 1  | 0 | 1.258525  | -2.787026 | -1.163510 |
| 34 | 1  | 0 | 0.520183  | -1.185666 | -2.855417 |
| 35 | 1  | 0 | 0.272325  | 0.064551  | -1.627261 |
| 36 | 6  | 0 | -0.738085 | -2.408202 | -0.631946 |
| 37 | 6  | 0 | -1.712454 | -2.418777 | -1.637551 |
| 38 | 1  | 0 | -0.805984 | -3.160157 | 0.155276  |
| 39 | 1  | 0 | -2.489049 | -3.179760 | -1.616500 |
| 40 | 1  | 0 | -1.538354 | -1.973461 | -2.614611 |
| 41 | 16 | 0 | -4.053384 | 0.420458  | -0.063764 |
| 42 | 8  | 0 | -5.147087 | 0.267240  | -1.088676 |
| 43 | 6  | 0 | -3.627171 | 2.170999  | -0.003151 |
| 44 | 1  | 0 | -2.942608 | 2.352033  | 0.829187  |
| 45 | 1  | 0 | -3.142931 | 2.425724  | -0.947790 |
| 46 | 1  | 0 | -4.544308 | 2.752526  | 0.120495  |
| 47 | 6  | 0 | -4.814606 | 0.293805  | 1.564264  |
| 48 | 1  | 0 | -5.196806 | -0.723216 | 1.670988  |
| 49 | 1  | 0 | -4.055707 | 0.483184  | 2.327973  |
| 50 | 1  | 0 | -5.631379 | 1.016258  | 1.640353  |
